# Supplementary material
Source: MDPI journal article supplement (https://www.mdpi.com/1996-1073/13/15/3956)
Supplement: s1 [file s1]

## 1. Descriptive statistics

| Variable |         | Mean     | Std. Dev. | Min       | Max      | Observations    |
|----------|---------|----------|-----------|-----------|----------|-----------------|
| CO2_pc   | overall | 6.931061 | 10.7971   | .0107203  | 70.04223 | N = 947         |
|          | between |          | 10.50991  | .0298371  | 51.68478 | n = 37          |
|          | within  |          | 2.960785  | -20.03132 | 25.2885  | T = 25.5946     |
| MVA_sh   | overall | 3.373243 | 11.49126  | -61.93001 | 140.5818 | N = 770         |
|          | between |          | 4.37203   | -2.517521 | 17.85542 | n = 35          |
|          | within  |          | 10.95441  | -59.6154  | 142.8964 | T = 22          |
| Tertia~H | overall | 44.12582 | 10.00238  | 10.56928  | 80.67685 | N = 896         |
|          | between |          | 9.731648  | 28.10772  | 80.10726 | n = 36          |
|          | within  |          | 5.959345  | 24.47794  | 90.63082 | T = 24.8889     |
| PCI~2011 | overall | 17807.54 | 23332.49  | 545.2958  | 124024.6 | N = 1018        |
|          | between |          | 25076.84  | 746.2983  | 114777   | n = 37          |
|          | within  |          | 3901.988  | -1078.977 | 38313.54 | T = 27.5135     |
| El_fro~s | overall | 68.03868 | 33.82682  | 0         | 100      | N = 860         |
|          | between |          | 33.57601  | .4209187  | 100      | n = 32          |
|          | within  |          | 6.912954  | 36.17382  | 102.5705 | T = 26.875      |
| Politi~s | overall | 5.0518   | 1.856907  | 1         | 7        | N = 1139        |
|          | between |          | 1.659042  | 1.806452  | 7        | n = 37          |
|          | within  |          | .8737391  | 1.180832  | 8.632445 | T-bar = 30.7838 |
| Civil_~s | overall | 4.924495 | 1.46293   | 1         | 7        | N = 1139        |
|          | between |          | 1.347328  | 1.967742  | 6.967742 | n = 37          |
|          | within  |          | .609417   | 3.021269  | 8.053527 | T-bar = 30.7838 |

## 2. Structural Break Tests

ID=Algeria

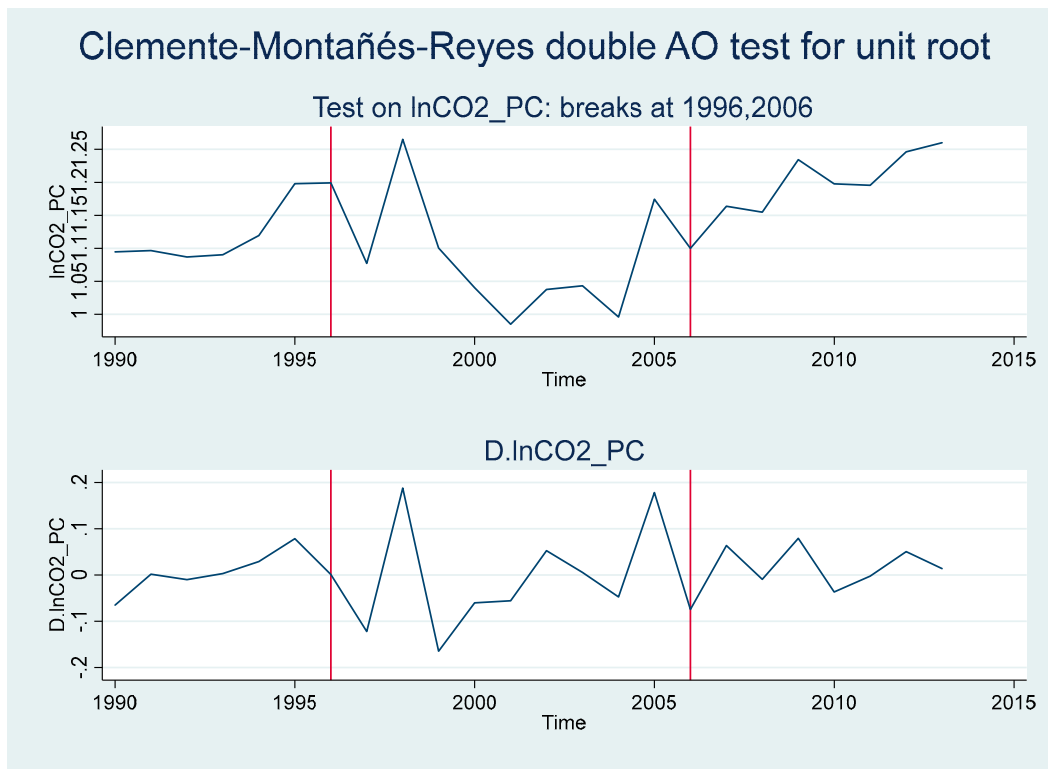

ID=Angola

### Clemente-Montañés-Reyes double AO test for unit root

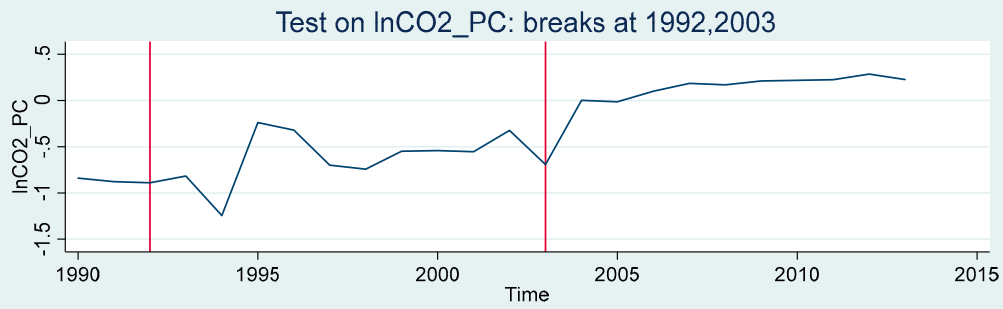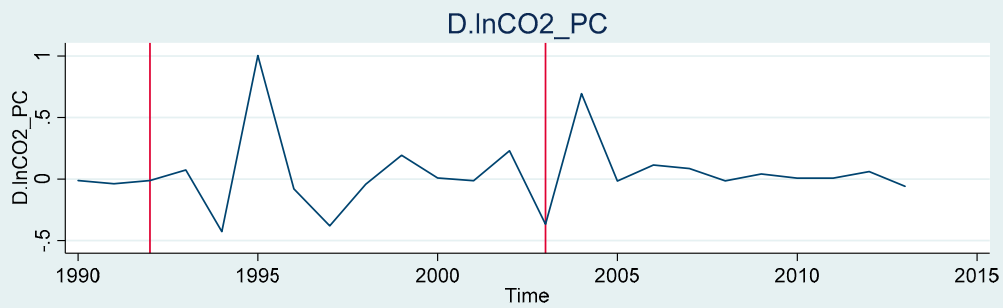

ID=Argentina

### Clemente-Montañés-Reyes double AO test for unit root

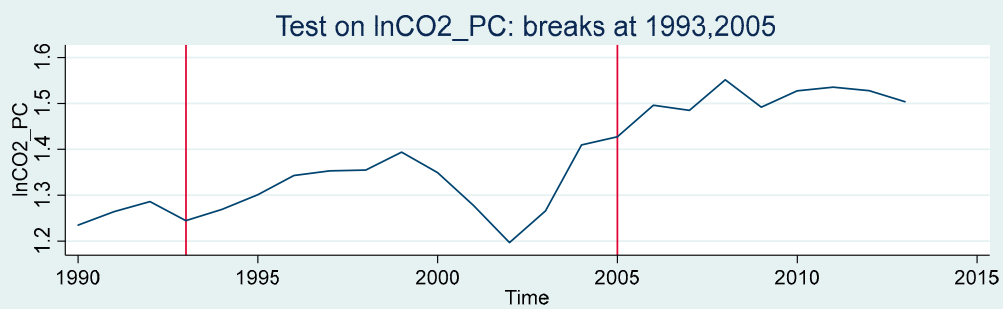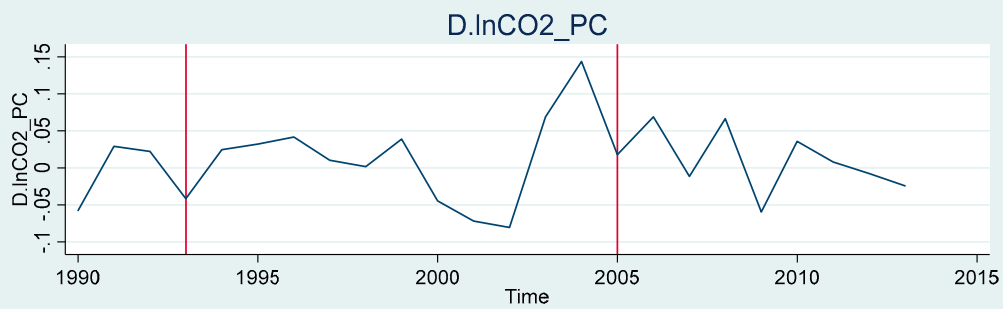

ID=Azerbaijan

### Clemente-Montañés-Reyes double AO test for unit root

Test on  $\ln\text{CO2\_PC}$ : breaks at 1996,2006

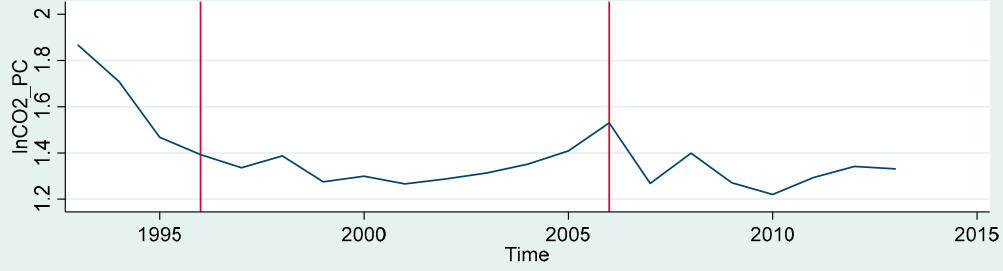

D.lnCO2\_PC

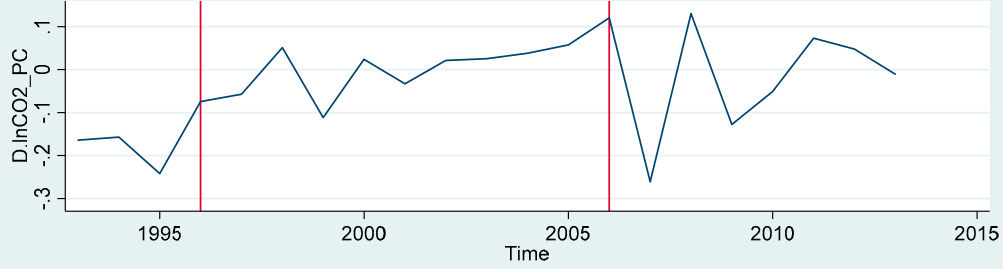

ID=Bahrain

### Clemente-Montañés-Reyes double AO test for unit root

Test on  $\ln\text{CO2\_PC}$ : breaks at 1994,1998

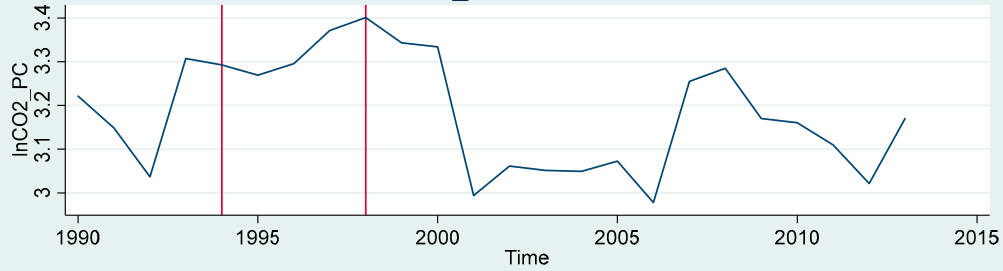

D.lnCO2\_PC

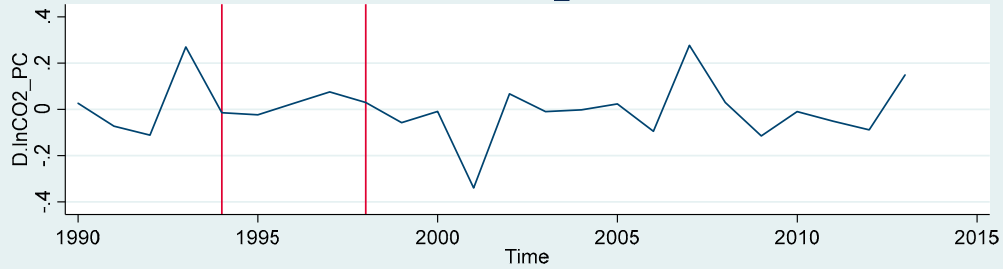

ID=Bolivia

### Clemente-Montañés-Reyes double AO test for unit root

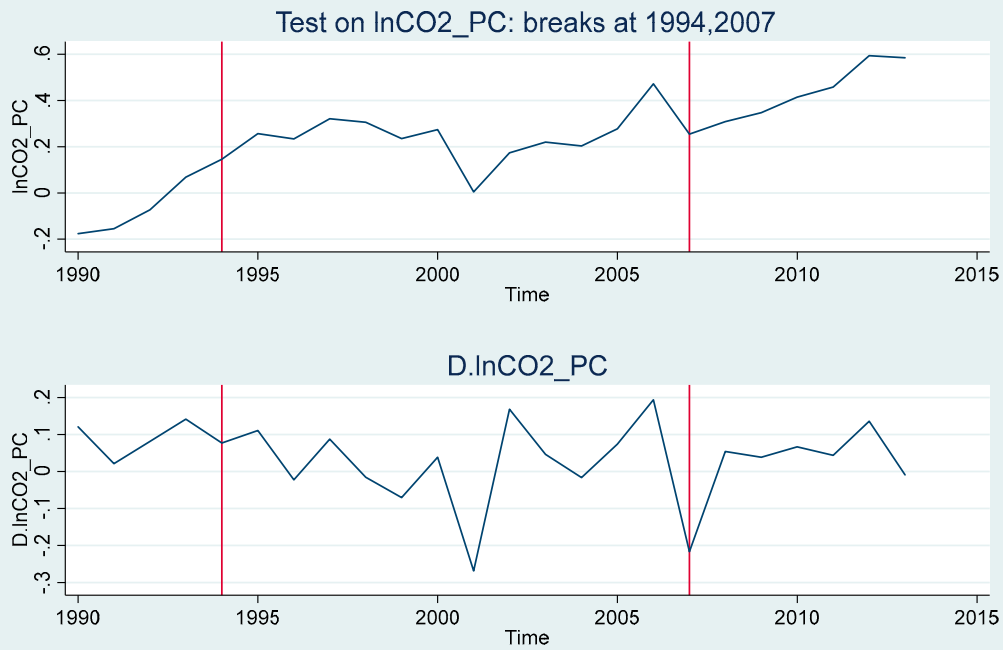

ID=Brazil

### Clemente-Montañés-Reyes double AO test for unit root

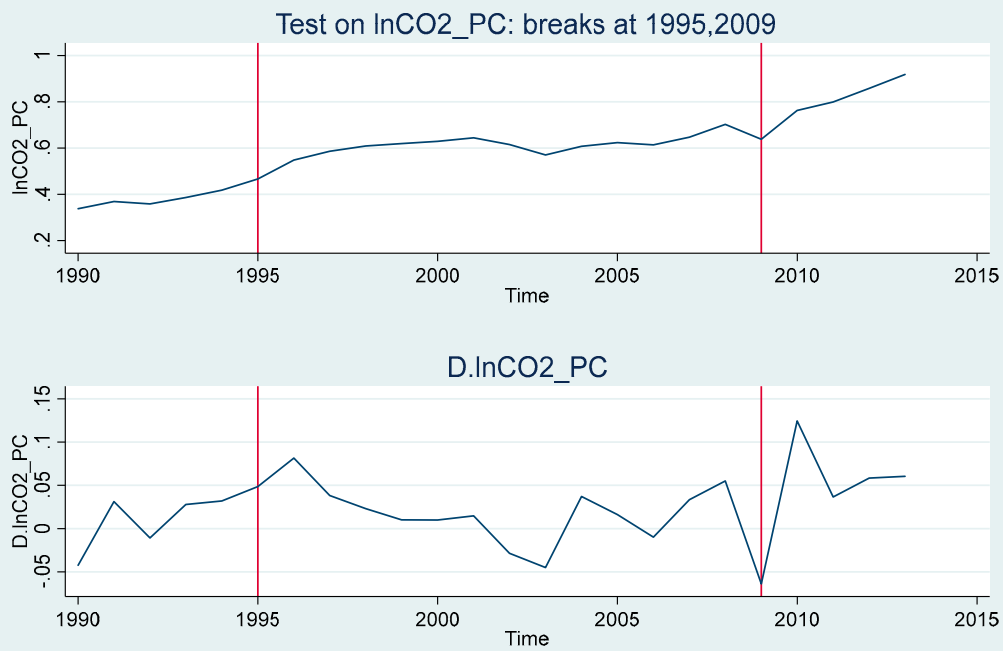

ID=Brunei Darussalam

### Clemente-Montañés-Reyes double AO test for unit root

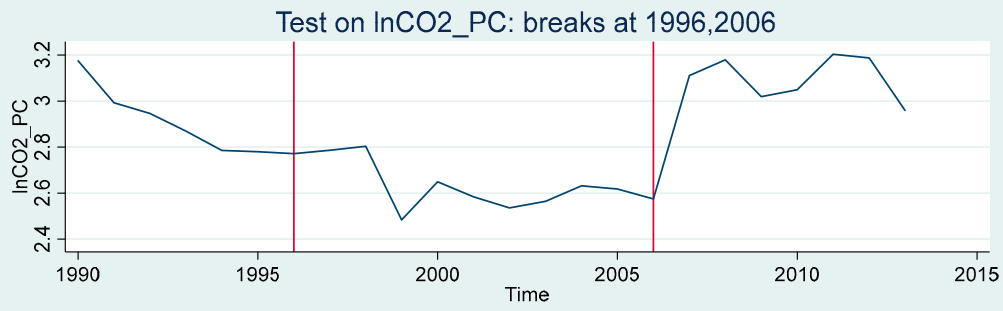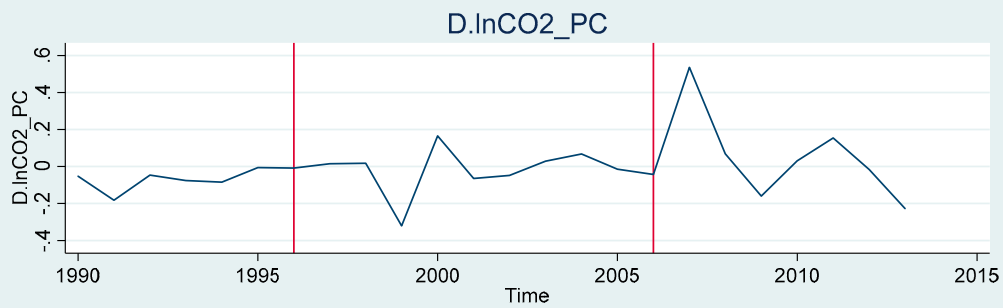

ID=Cameroon

### Clemente-Montañés-Reyes double AO test for unit root

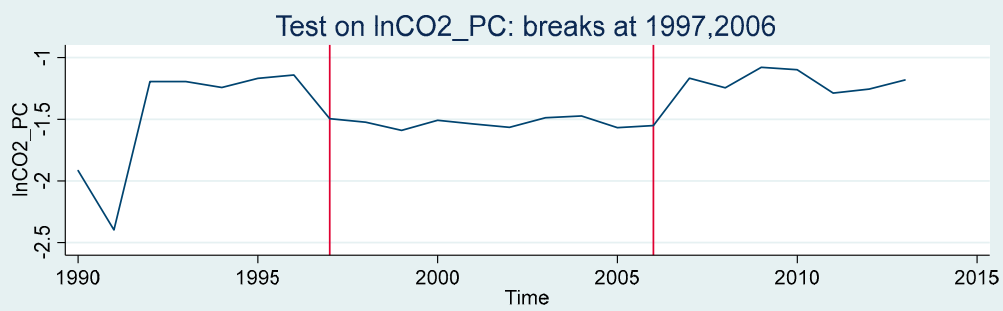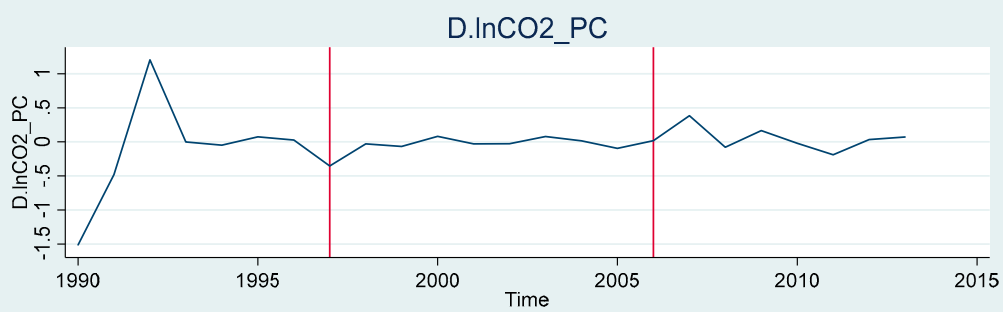

ID=Central African Republic

### Clemente-Montañés-Reyes double AO test for unit root

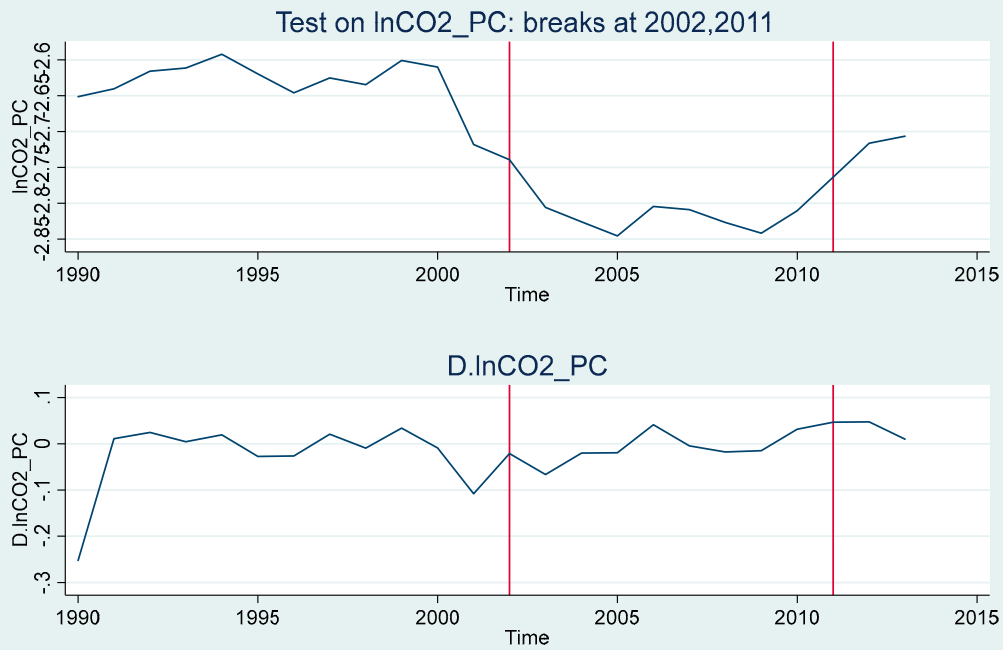

ID=Chad

### Clemente-Montañés-Reyes double AO test for unit root

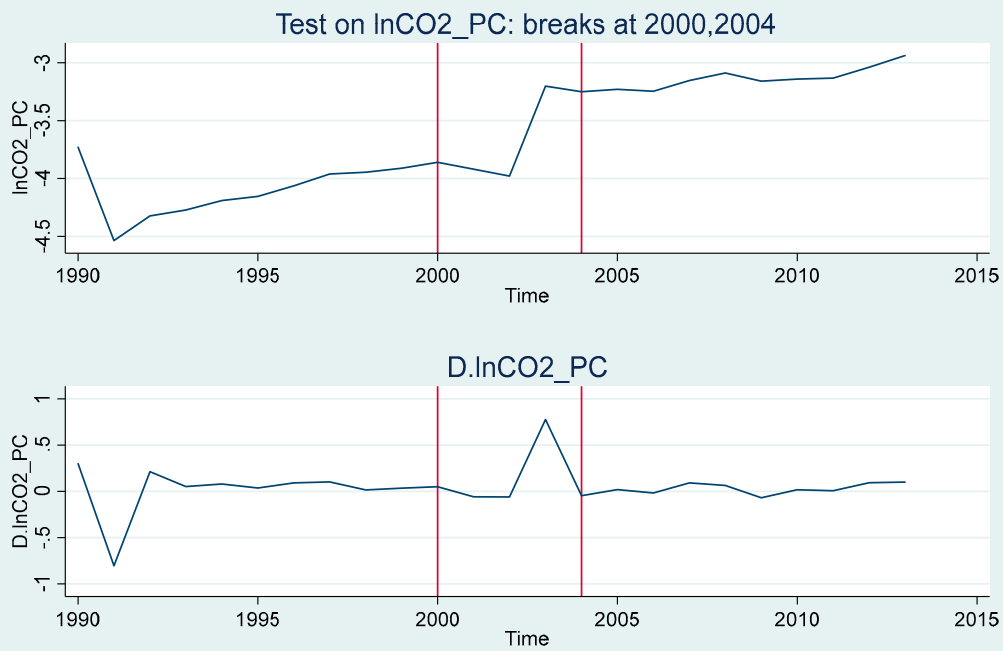

ID=Colombia

### Clemente-Montañés-Reyes double AO test for unit root

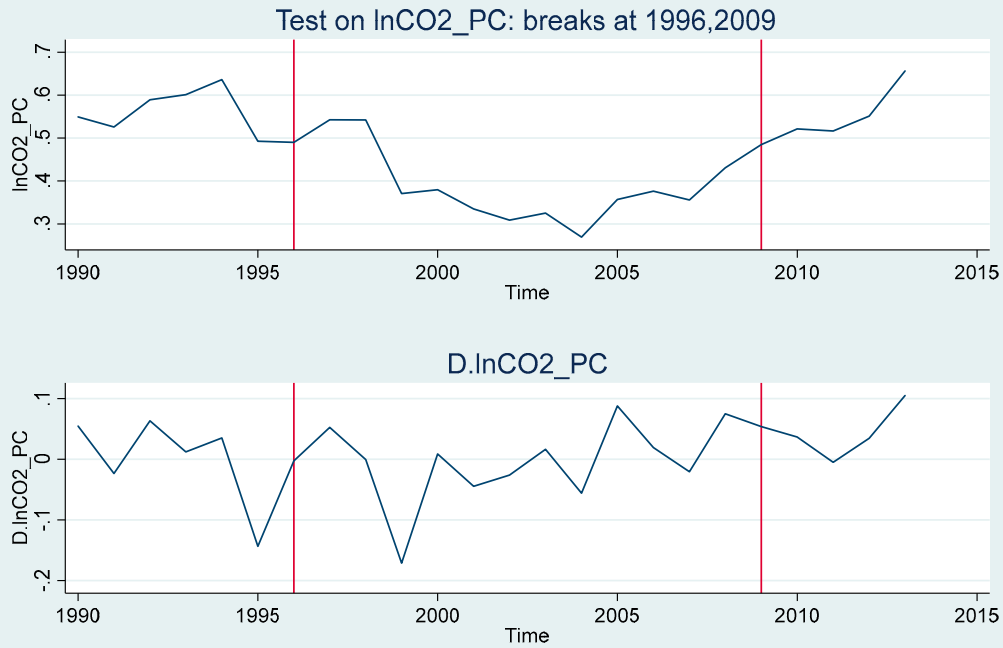

ID=Democratic Republic of Congo

### Clemente-Montañés-Reyes double AO test for unit root

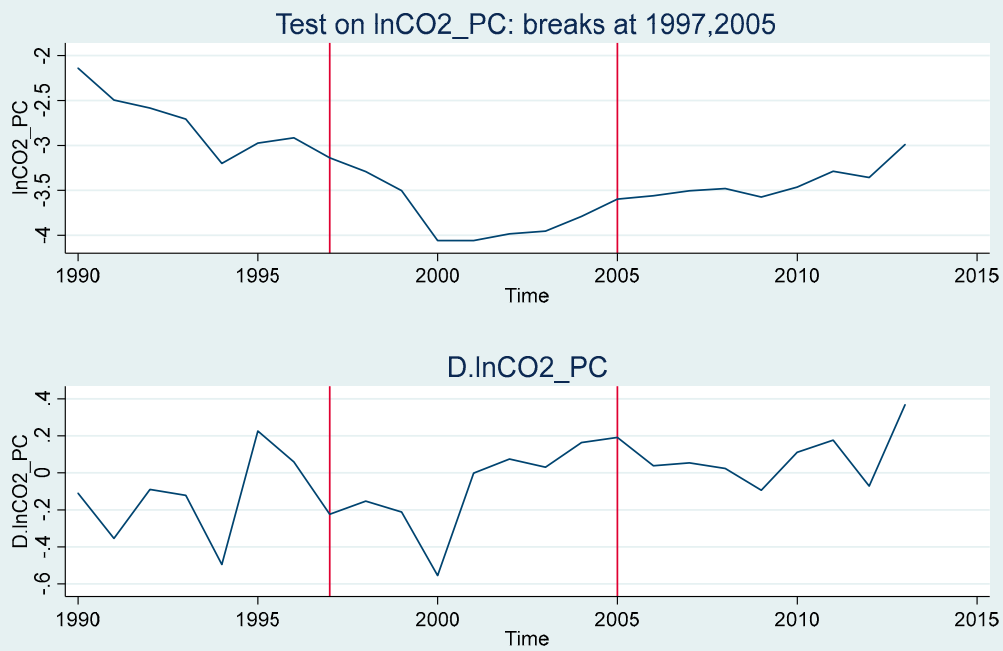

ID=Djibouti

### Clemente-Montañés-Reyes double AO test for unit root

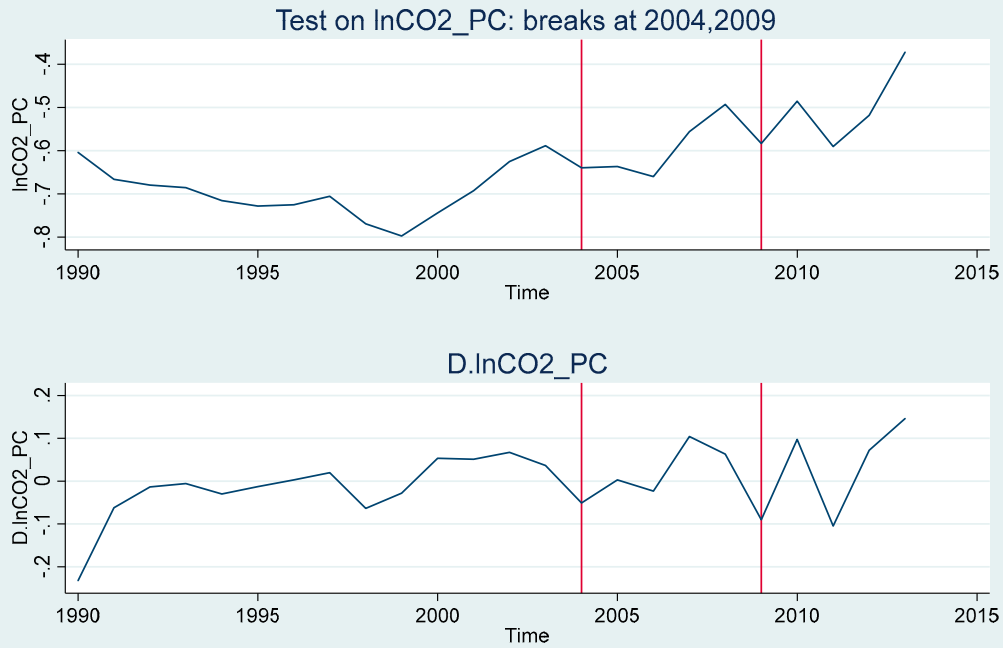

ID=Ecuador

### Clemente-Montañés-Reyes double AO test for unit root

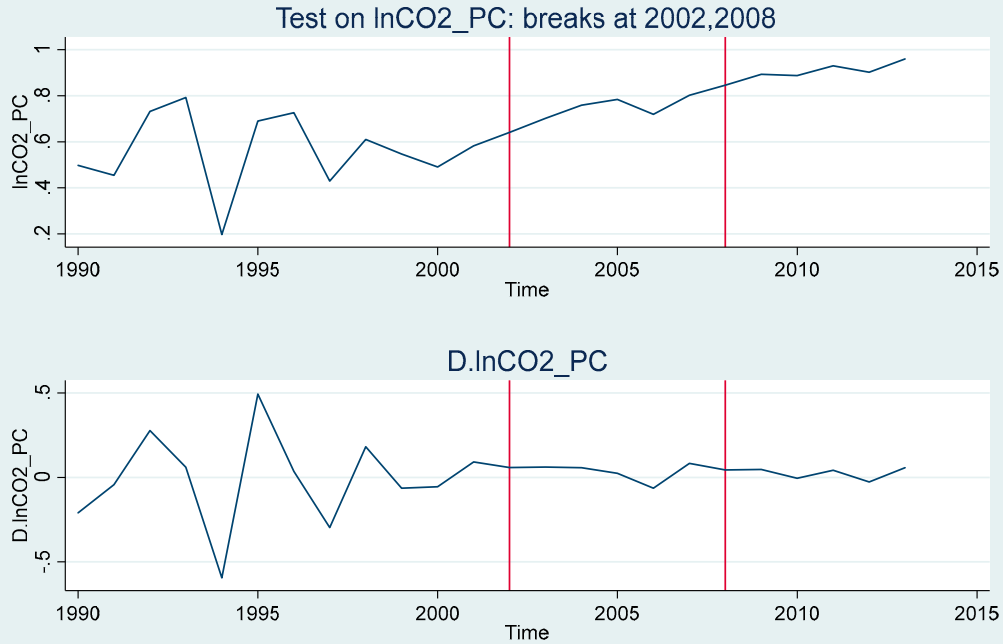

ID=16=Egypt



### Clemente-Montañés-Reyes double AO test for unit root

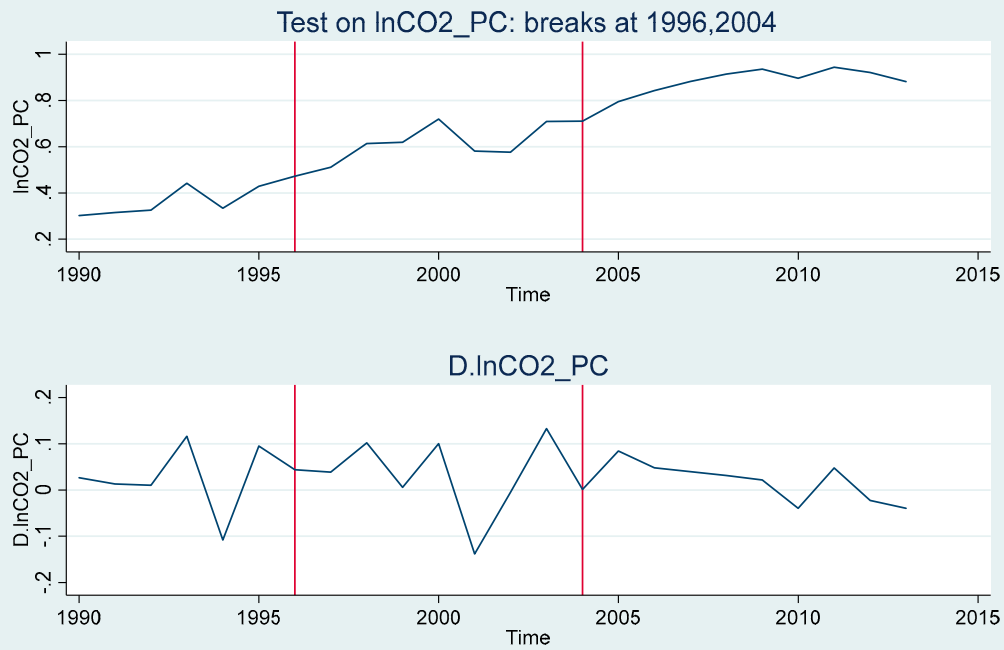

ID=17=Equatorial Guinea

### Clemente-Montañés-Reyes double AO test for unit root

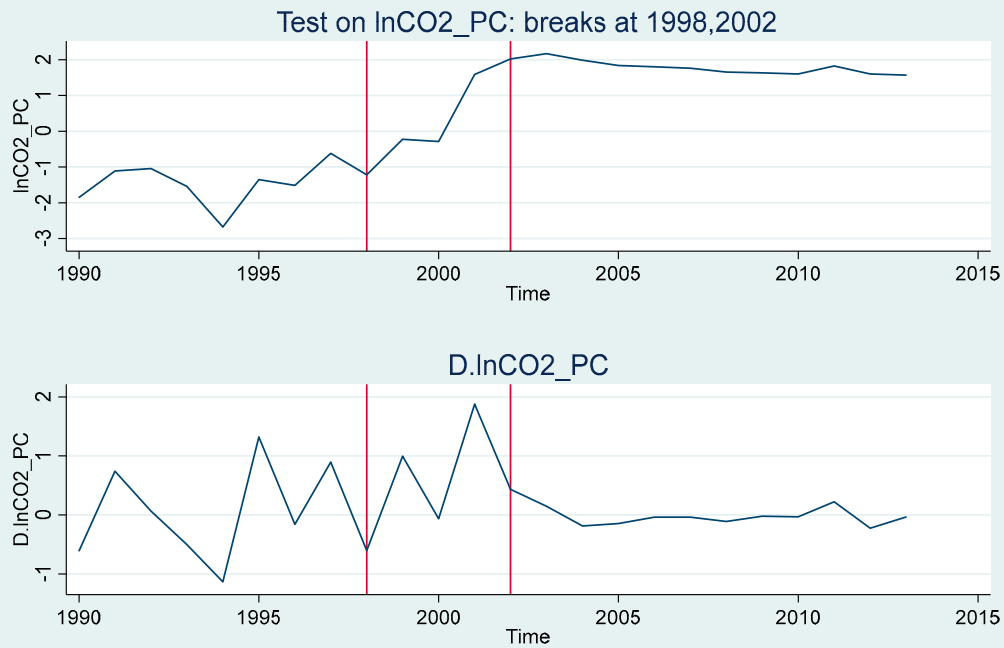

ID=18=Ghana

### Clemente-Montañés-Reyes double AO test for unit root

Test on  $\ln\text{CO2\_PC}$ : breaks at 1994,2009

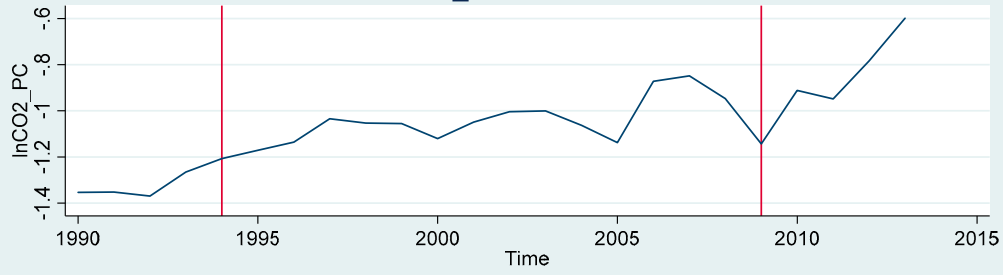

$D.\ln\text{CO2\_PC}$

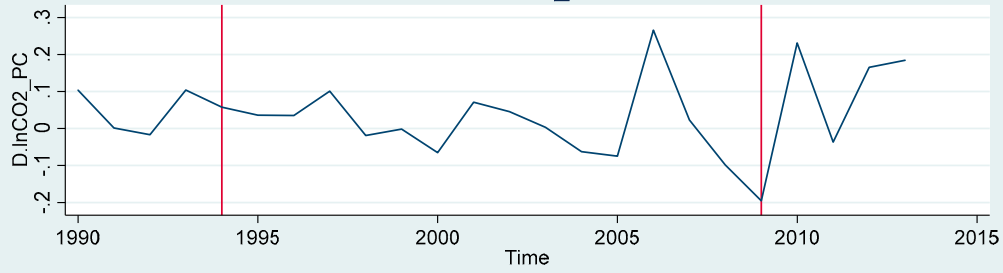

ID=19=Indonesia

### Clemente-Montañés-Reyes double AO test for unit root

Test on  $\ln\text{CO2\_PC}$ : breaks at 2001,2008

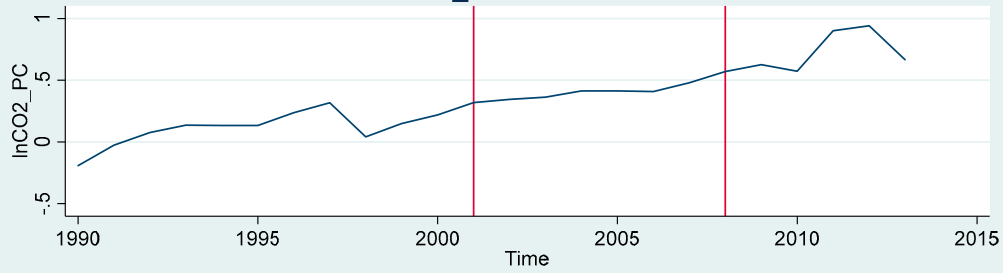

$D.\ln\text{CO2\_PC}$

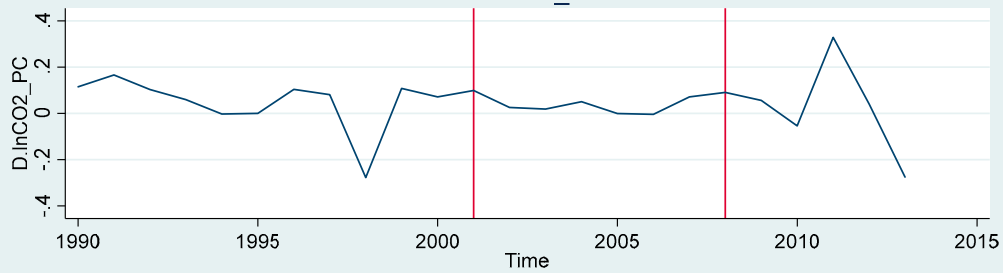

ID=20=Iran

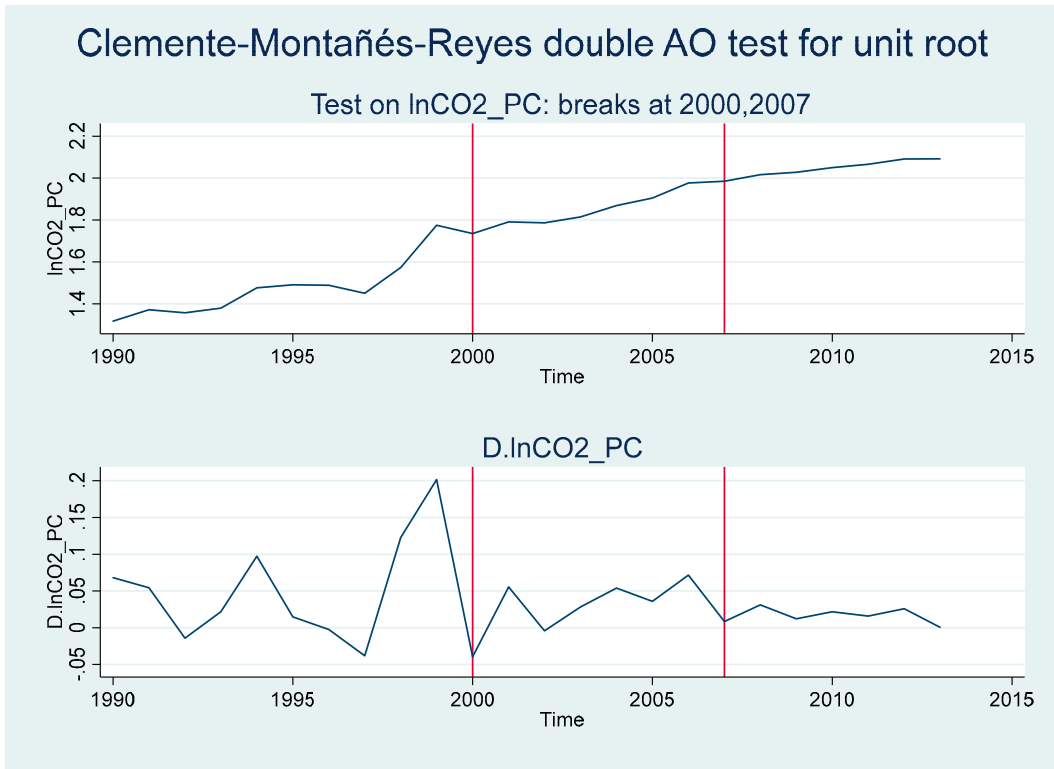

ID=21=Iraq

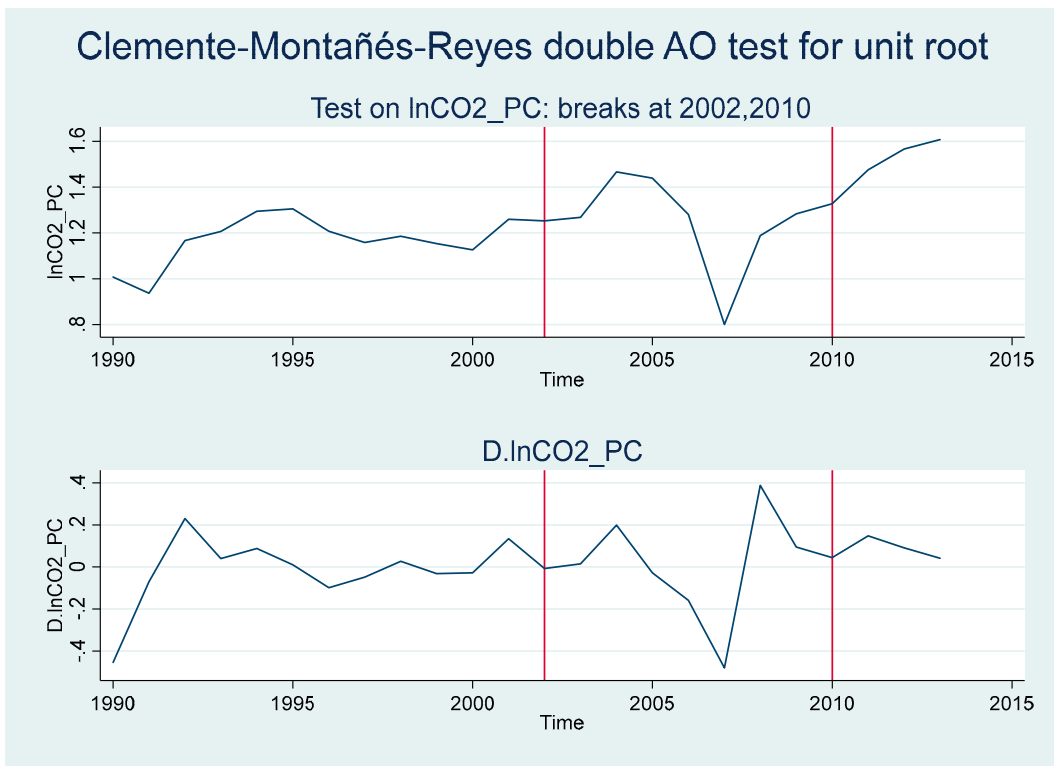

ID=22=Kuwait

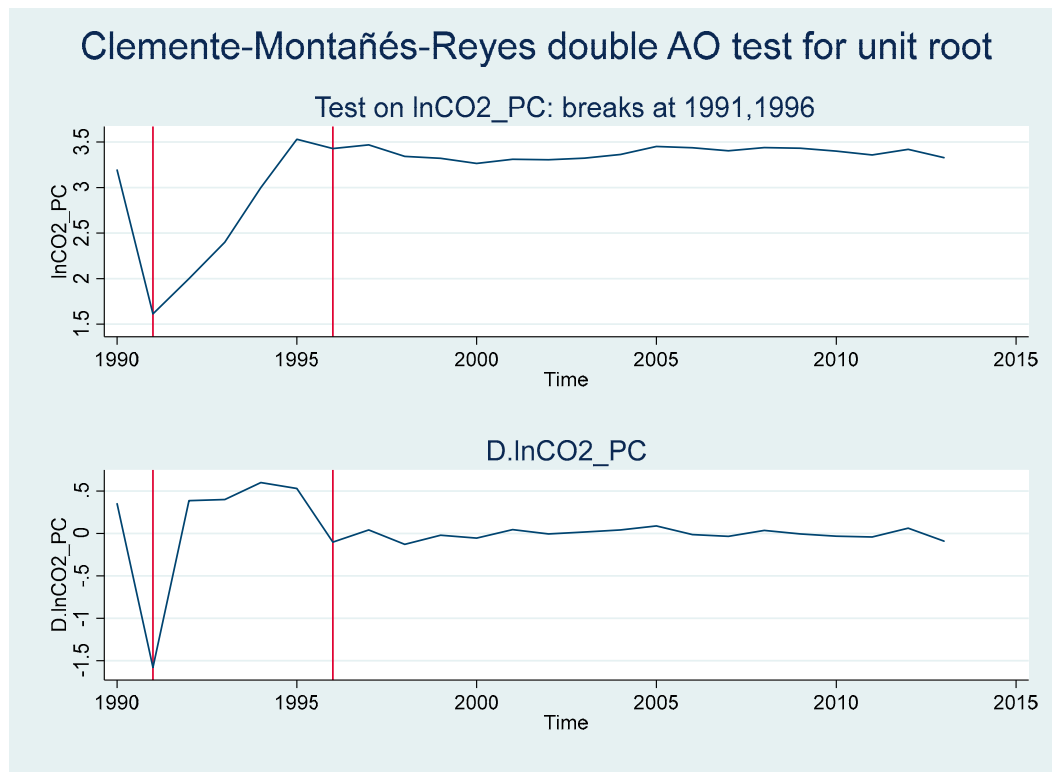

ID=23=Libya

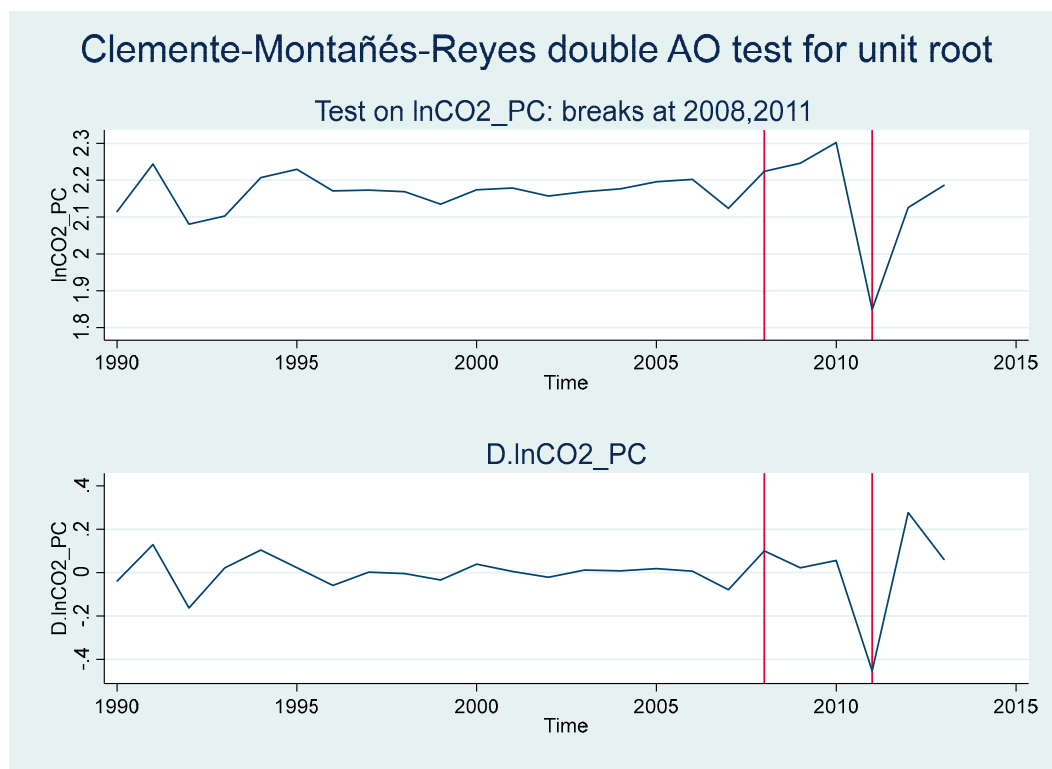

ID=24=Malaysia

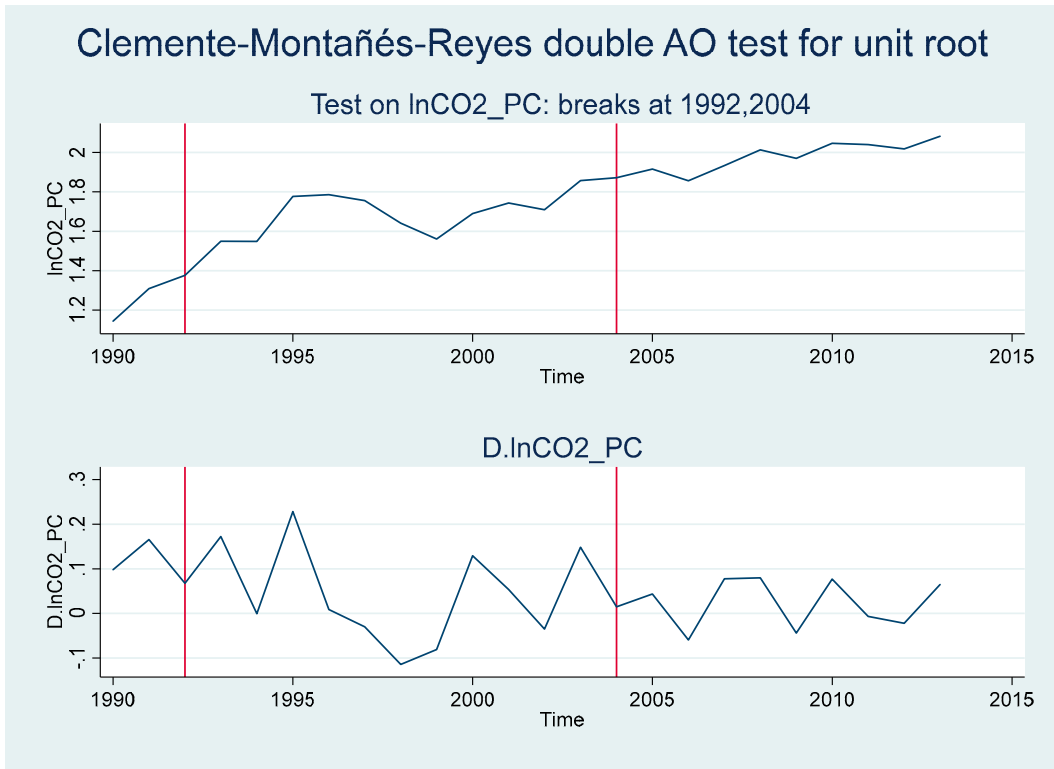

ID=25=Nigeria

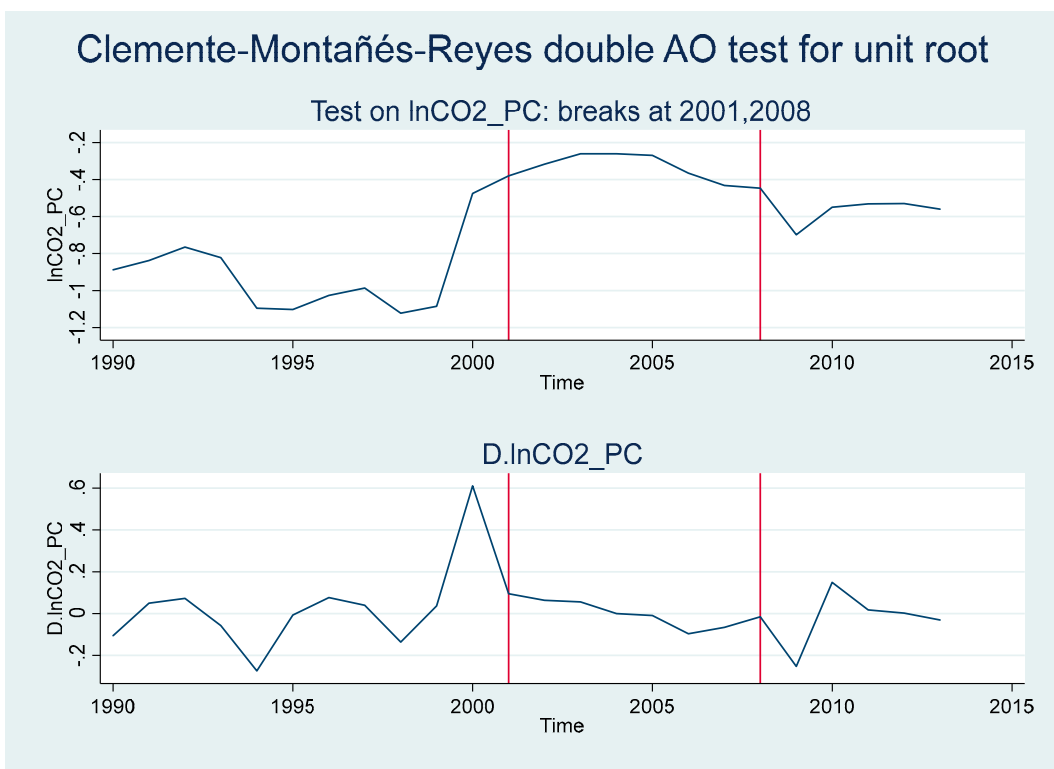

ID=26=Oman

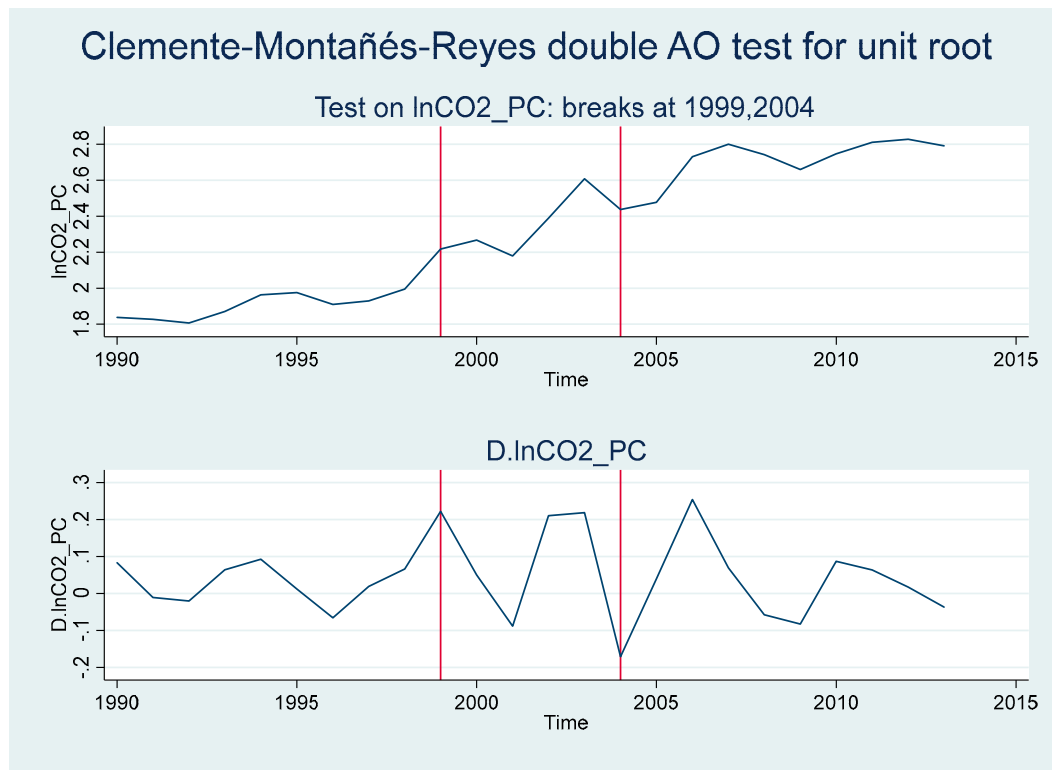

ID=27=Pakistan

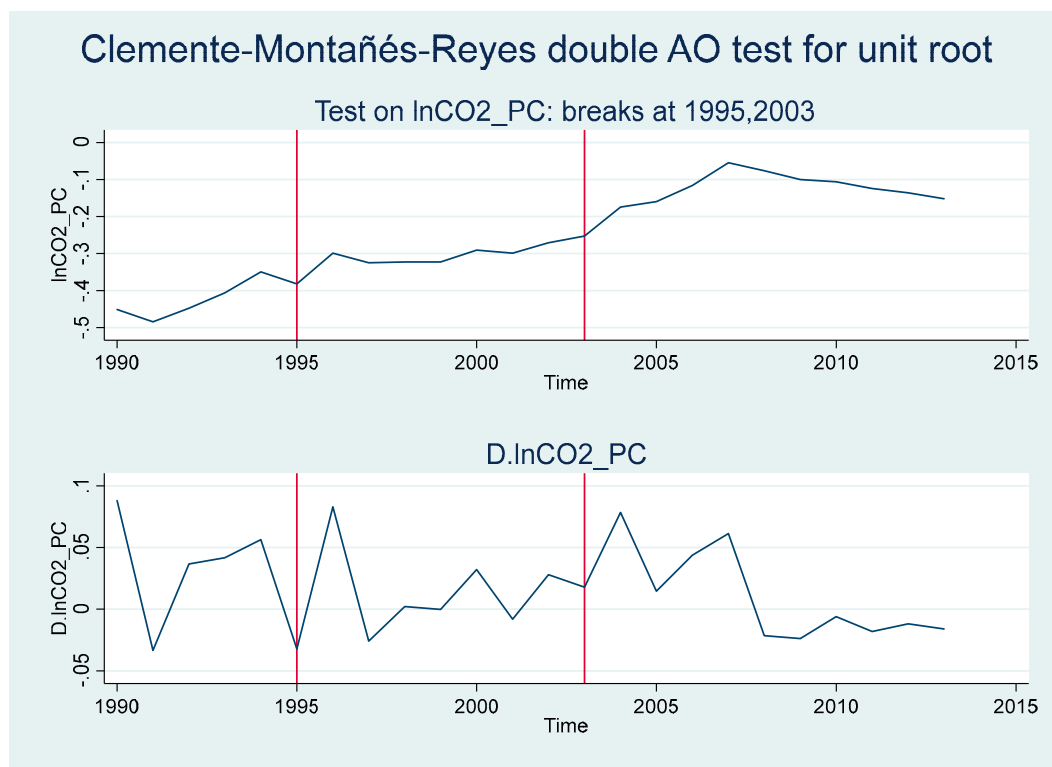

ID=28= Papua New Guinea

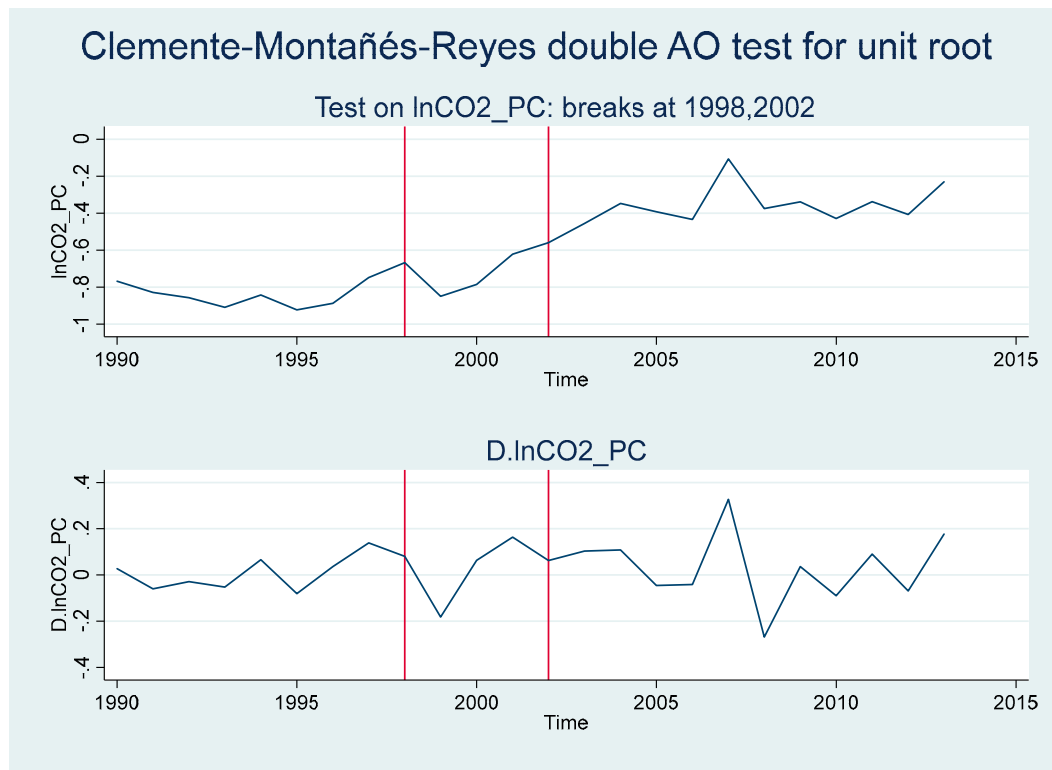

ID=29= Qatar

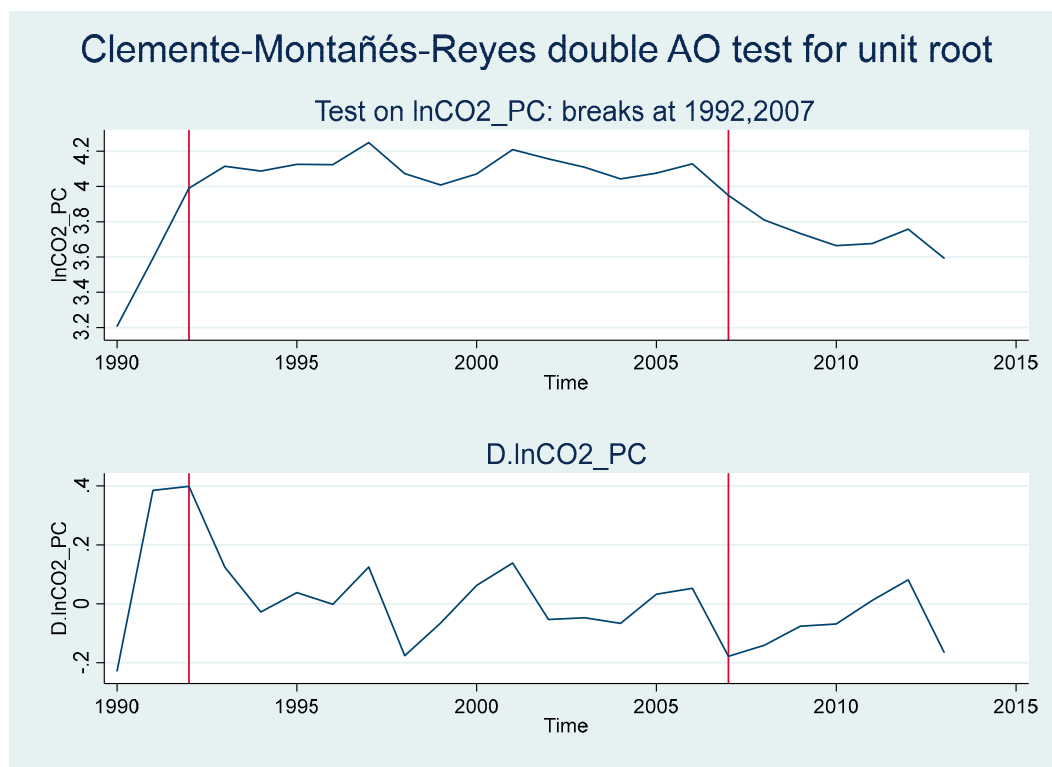

ID=30=Russia

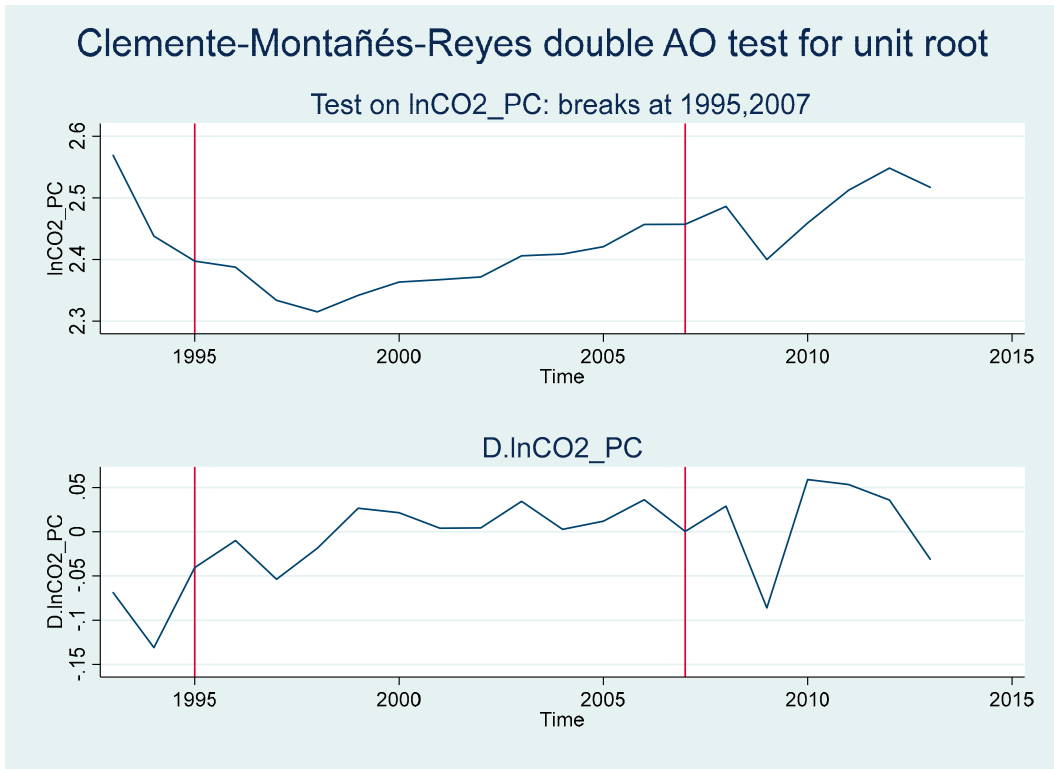

ID=31=Saudi Arabia

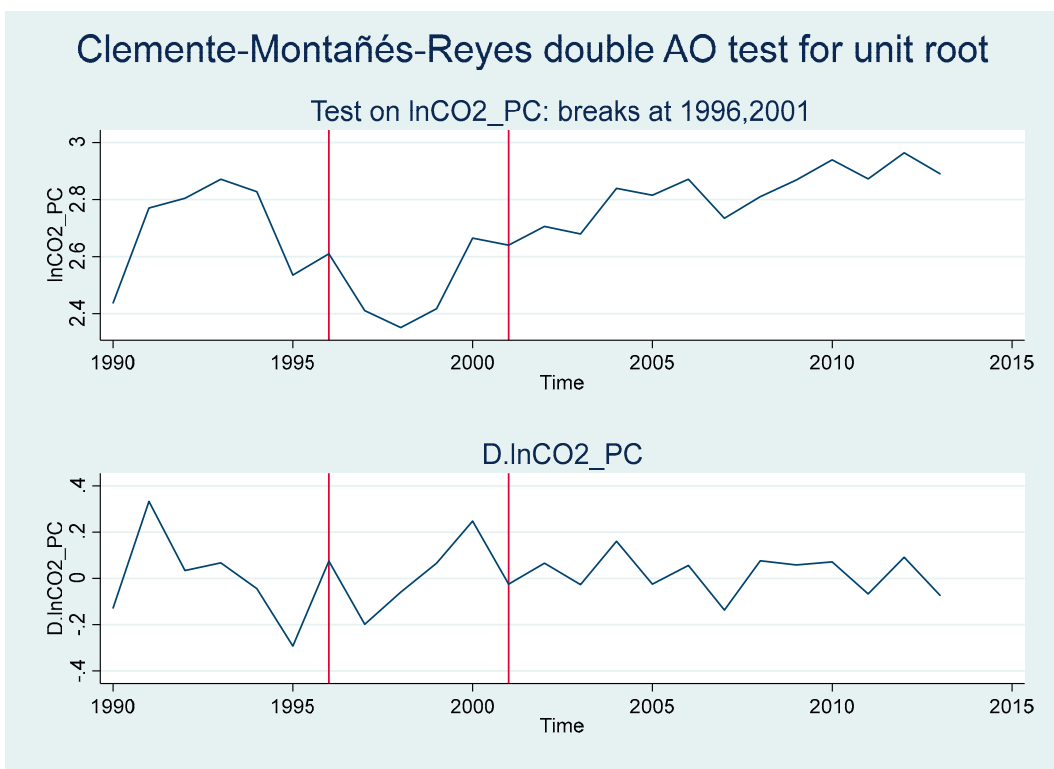



ID=32=Sudan

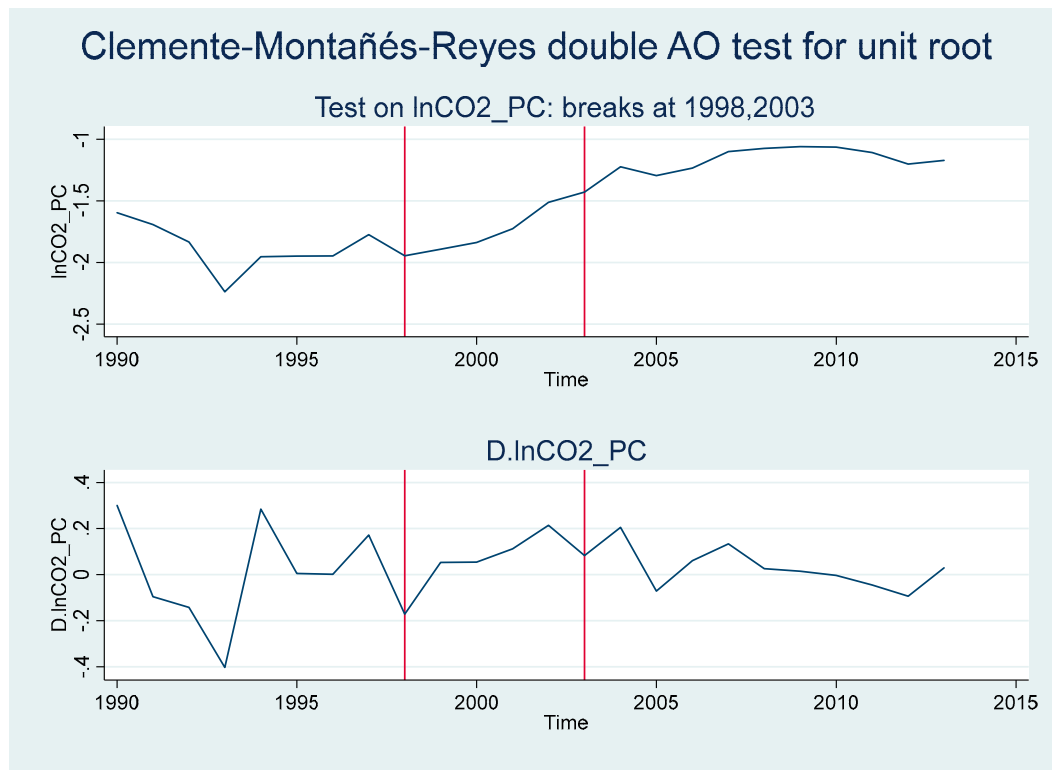

ID=33=Trinidad and Tonago

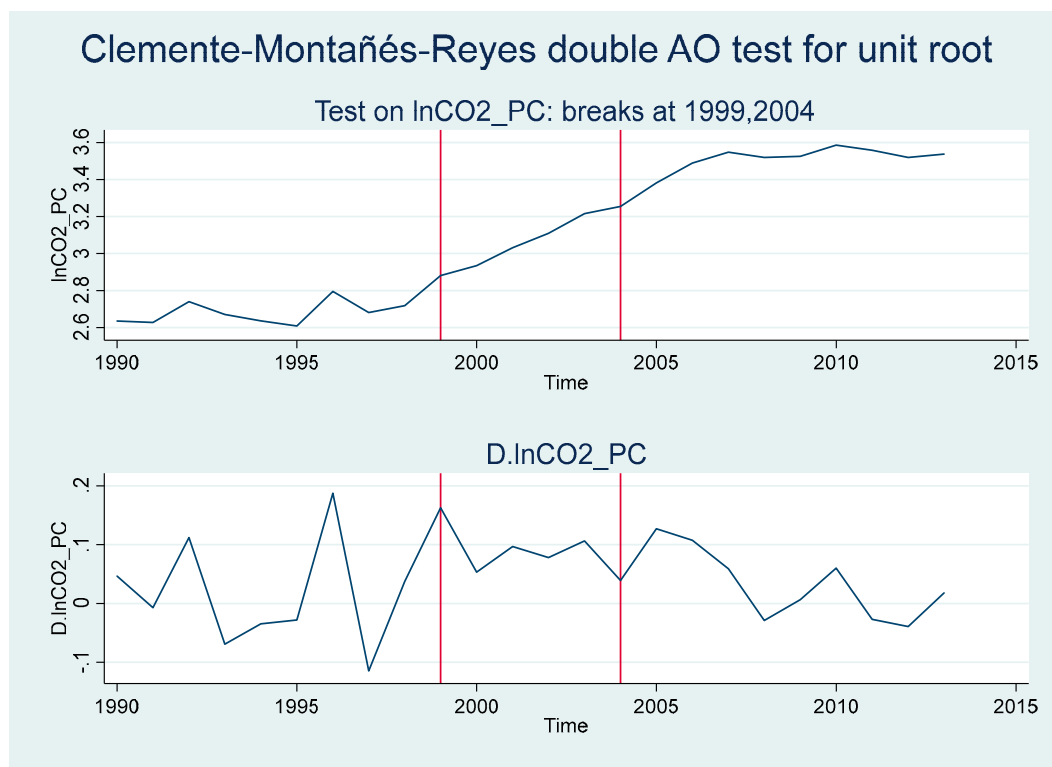

ID=34=Tunisia

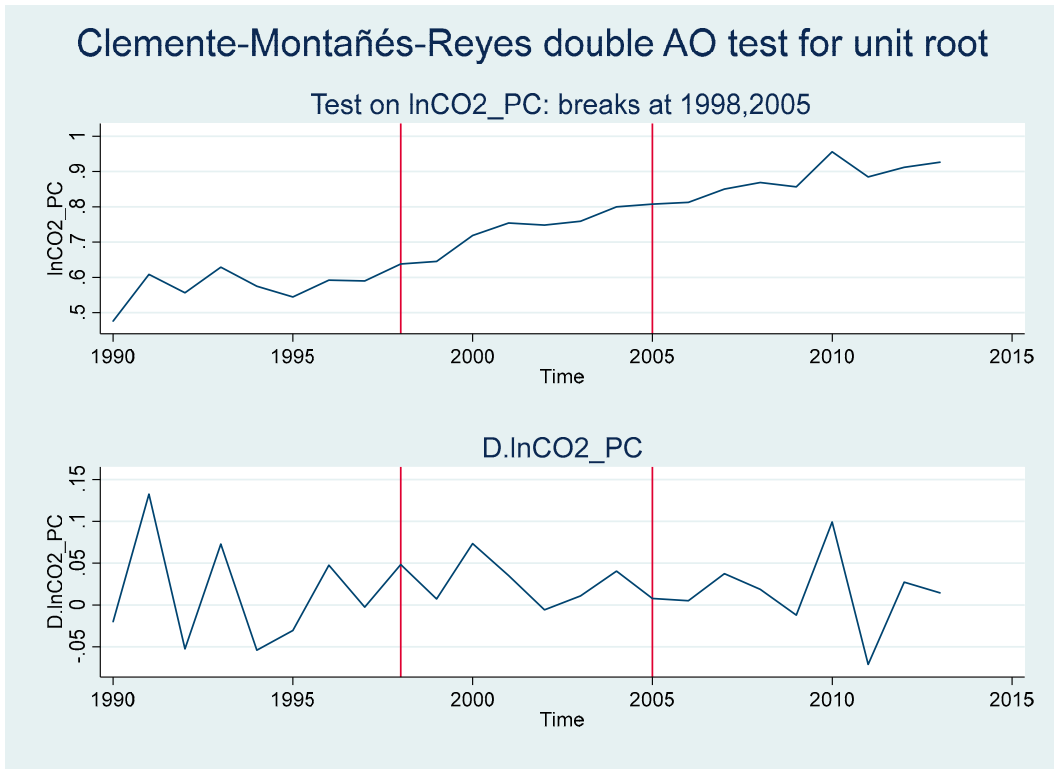

ID=35=Turkmenistan

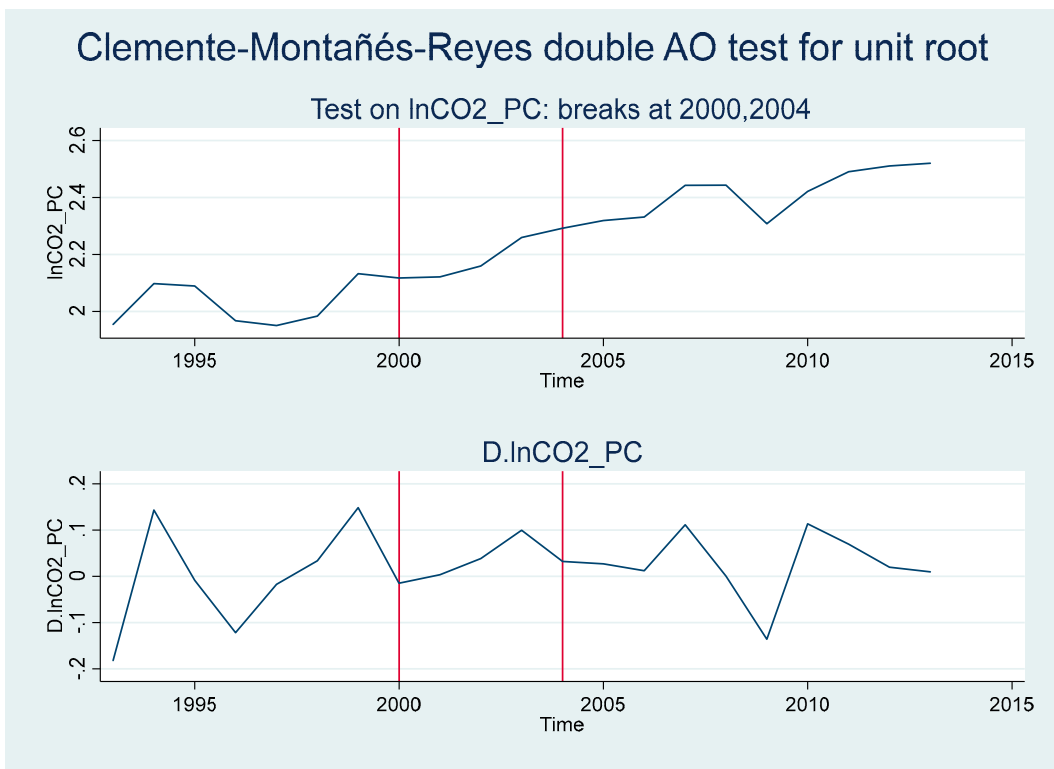

ID=36=Uzbekistan

### Clemente-Montañés-Reyes double AO test for unit root

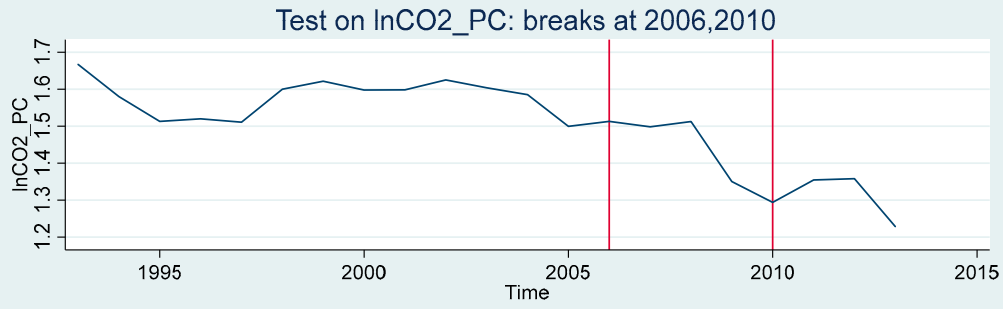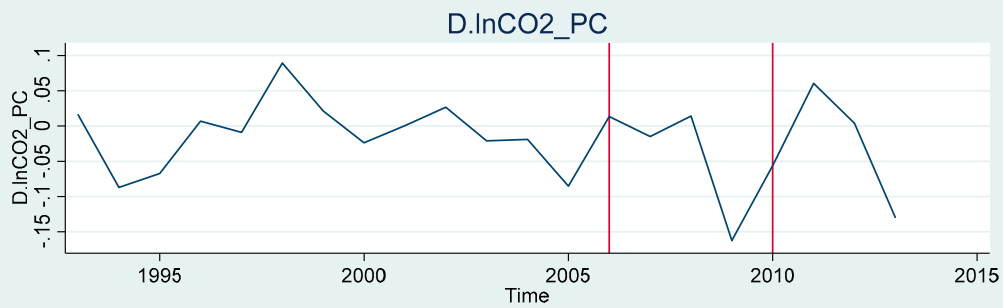

ID=37=Venezuela

### Clemente-Montañés-Reyes double AO test for unit root

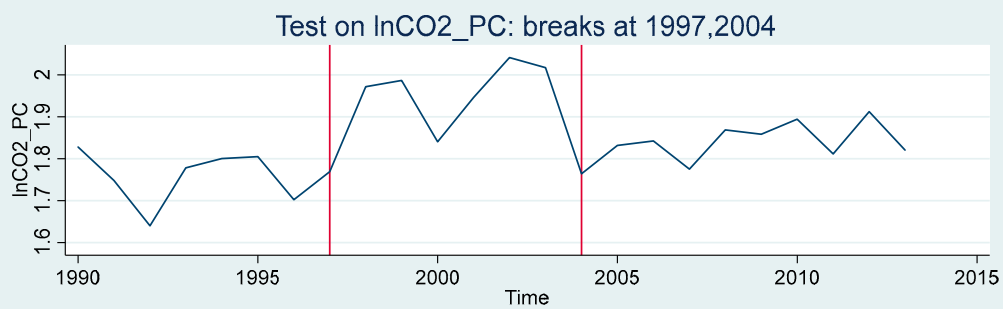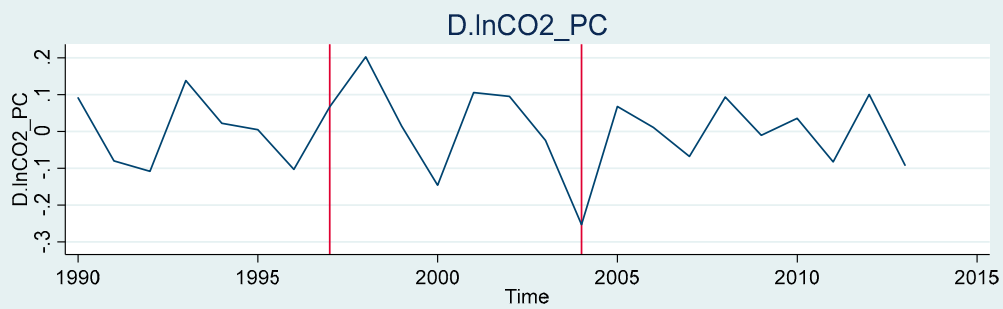

## **UNIT ROOT TESTS**

Fisher-type unit-root test for ln\_PCI  
Based on augmented Dickey-Fuller tests

Ho: All panels contain unit roots                      Number of panels        =     37  
Ha: At least one panel is stationary                    Avg. number of periods = 27.51

AR parameter: Panel-specific                            Asymptotics: T -> Infinity  
Panel means:    Included  
Time trend:     Not included                            Cross-sectional means removed  
Drift term:     Included                                 ADF regressions: 1 lag

|                              |    | Statistic | p-value |
|------------------------------|----|-----------|---------|
| Inverse chi-squared(72)      | P  | 230.7357  | 0.0000  |
| Inverse normal               | Z  | -9.4022   | 0.0000  |
| Inverse logit t(184)         | L* | -10.1353  | 0.0000  |
| Modified inv. chi-squared Pm |    | 13.2280   | 0.0000  |

P statistic requires number of panels to be finite.  
Other statistics are suitable for finite or infinite number of panels.

. xtunitroot fisher lnCO2\_PC , dfuller drift demean lags(1)

Fisher-type unit-root test for lnCO2\_PC  
Based on augmented Dickey-Fuller tests

Ho: All panels contain unit roots                      Number of panels        =     37  
Ha: At least one panel is stationary                    Avg. number of periods = 25.59

AR parameter: Panel-specific                            Asymptotics: T -> Infinity  
Panel means:    Included  
Time trend:     Not included                            Cross-sectional means removed  
Drift term:     Included                                 ADF regressions: 1 lag

|                              |    | Statistic | p-value |
|------------------------------|----|-----------|---------|
| Inverse chi-squared(74)      | P  | 274.9648  | 0.0000  |
| Inverse normal               | Z  | -11.3715  | 0.0000  |
| Inverse logit t(189)         | L* | -12.2506  | 0.0000  |
| Modified inv. chi-squared Pm |    | 16.5192   | 0.0000  |

P statistic requires number of panels to be finite.  
Other statistics are suitable for finite or infinite number of panels.

. xtunitroot fisher lnMVA , dfuller drift demean lags(1)

Fisher-type unit-root test for lnMVA  
Based on augmented Dickey-Fuller tests

Ho: All panels contain unit roots                      Number of panels        =     33  
Ha: At least one panel is stationary                    Avg. number of periods = 22.30

AR parameter: Panel-specific                            Asymptotics: T -> Infinity  
Panel means:    Included  
Time trend:     Not included                            Cross-sectional means removed  
Drift term:     Included                                 ADF regressions: 1 lag

|                              |    | Statistic | p-value |
|------------------------------|----|-----------|---------|
| Inverse chi-squared(66)      | P  | 181.6436  | 0.0000  |
| Inverse normal               | Z  | -7.9936   | 0.0000  |
| Inverse logit t(169)         | L* | -8.1860   | 0.0000  |
| Modified inv. chi-squared Pm |    | 10.0655   | 0.0000  |

P statistic requires number of panels to be finite.  
Other statistics are suitable for finite or infinite number of panels.

. xtunitroot fisher lnTVA , dfuller drift demean lags(1)  
could not compute test for panel 32

Fisher-type unit-root test for lnTVA  
Based on augmented Dickey-Fuller tests

---

Ho: All panels contain unit roots                      Number of panels            =        34  
Ha: At least one panel is stationary                    Avg. number of periods =    23.24

AR parameter: Panel-specific                            Asymptotics: T -> Infinity  
Panel means:    Included  
Time trend:     Not included                            Cross-sectional means removed  
Drift term:      Included                                ADF regressions: 1 lag

---

|                           |    | Statistic | p-value |
|---------------------------|----|-----------|---------|
| Inverse chi-squared(66)   | P  | 155.0986  | 0.0000  |
| Inverse normal            | Z  | -6.9903   | 0.0000  |
| Inverse logit t(169)      | L* | -6.9170   | 0.0000  |
| Modified inv. chi-squared | Pm | 7.7550    | 0.0000  |

---

P statistic requires number of panels to be finite.  
Other statistics are suitable for finite or infinite number of panels.

---

. xtunitroot fisher ln\_PCI2 , dfuller drift demean lags(1)  
could not compute test for panel 14

Fisher-type unit-root test for ln\_PCI2  
Based on augmented Dickey-Fuller tests

---

Ho: All panels contain unit roots                      Number of panels            =        37  
Ha: At least one panel is stationary                    Avg. number of periods =    27.51

AR parameter: Panel-specific                            Asymptotics: T -> Infinity  
Panel means:    Included  
Time trend:     Not included                            Cross-sectional means removed  
Drift term:      Included                                ADF regressions: 1 lag

---

|                           |    | Statistic | p-value |
|---------------------------|----|-----------|---------|
| Inverse chi-squared(72)   | P  | 230.7357  | 0.0000  |
| Inverse normal            | Z  | -9.4022   | 0.0000  |
| Inverse logit t(184)      | L* | -10.1353  | 0.0000  |
| Modified inv. chi-squared | Pm | 13.2280   | 0.0000  |

---

P statistic requires number of panels to be finite.  
Other statistics are suitable for finite or infinite number of panels.

---

. xtunitroot fisher ln\_Power\_fossils , dfuller drift demean lags(1)

Fisher-type unit-root test for ln\_Power\_fossils

Based on augmented Dickey-Fuller tests

---

Ho: All panels contain unit roots                      Number of panels                      =            32  
Ha: At least one panel is stationary                      Avg. number of periods =    26.41

AR parameter: Panel-specific                                      Asymptotics: T -> Infinity  
Panel means:    Included  
Time trend:    Not included                                      Cross-sectional means removed  
Drift term:    Included                                              ADF regressions: 1 lag

---

|                           |    | Statistic | p-value |
|---------------------------|----|-----------|---------|
| Inverse chi-squared(64)   | P  | 187.9303  | 0.0000  |
| Inverse normal            | Z  | -8.5332   | 0.0000  |
| Inverse logit t(164)      | L* | -8.7981   | 0.0000  |
| Modified inv. chi-squared | Pm | 10.9540   | 0.0000  |

---

P statistic requires number of panels to be finite.  
Other statistics are suitable for finite or infinite number of panels.

---

. xtunitroot fisher lnOil\_Sh , dfuller drift demean lags(1)

Fisher-type unit-root test for lnOil\_Sh

Based on augmented Dickey-Fuller tests

---

Ho: All panels contain unit roots                      Number of panels                      =            35  
Ha: At least one panel is stationary                      Avg. number of periods =    27.57

AR parameter: Panel-specific                                      Asymptotics: T -> Infinity  
Panel means:    Included  
Time trend:    Not included                                      Cross-sectional means removed  
Drift term:    Included                                              ADF regressions: 1 lag

---

|                           |    | Statistic | p-value |
|---------------------------|----|-----------|---------|
| Inverse chi-squared(70)   | P  | 276.0013  | 0.0000  |
| Inverse normal            | Z  | -11.3804  | 0.0000  |
| Inverse logit t(179)      | L* | -12.6740  | 0.0000  |
| Modified inv. chi-squared | Pm | 17.4103   | 0.0000  |

---

P statistic requires number of panels to be finite.  
Other statistics are suitable for finite or infinite number of panels.

---

. xtunitroot fisher lnOil2 , dfuller drift demean lags(1)

Fisher-type unit-root test for lnOil2

Based on augmented Dickey-Fuller tests

---

Ho: All panels contain unit roots                      Number of panels                      =            35  
Ha: At least one panel is stationary                      Avg. number of periods =    27.57

AR parameter: Panel-specific                                      Asymptotics: T -> Infinity  
Panel means:    Included  
Time trend:    Not included                                      Cross-sectional means removed  
Drift term:    Included                                              ADF regressions: 1 lag

---

|                           |    | Statistic | p-value |
|---------------------------|----|-----------|---------|
| Inverse chi-squared(70)   | P  | 276.0013  | 0.0000  |
| Inverse normal            | Z  | -11.3804  | 0.0000  |
| Inverse logit t(179)      | L* | -12.6740  | 0.0000  |
| Modified inv. chi-squared | Pm | 17.4103   | 0.0000  |

---

P statistic requires number of panels to be finite.  
Other statistics are suitable for finite or infinite number of panels.

---

. xtunitroot fisher lnOil2 , dfuller drift demean lags(0)

Fisher-type unit-root test for lnOil2  
Based on augmented Dickey-Fuller tests

Ho: All panels contain unit roots           Number of panels       =    35  
Ha: At least one panel is stationary       Avg. number of periods =  27.57

AR parameter: Panel-specific               Asymptotics: T -> Infinity  
Panel means:   Included  
Time trend:    Not included                Cross-sectional means removed  
Drift term:    Included                    ADF regressions: 0 lags

|                           |    | Statistic | p-value |
|---------------------------|----|-----------|---------|
| Inverse chi-squared(70)   | P  | 319.7655  | 0.0000  |
| Inverse normal            | Z  | -12.0282  | 0.0000  |
| Inverse logit t(179)      | L* | -14.5201  | 0.0000  |
| Modified inv. chi-squared | Pm | 21.1090   | 0.0000  |

P statistic requires number of panels to be finite.  
Other statistics are suitable for finite or infinite number of panels.

. xtunitroot fisher Tertiary\_SH , dfuller drift demean lags(0)

Fisher-type unit-root test for Tertiary\_SH  
Based on augmented Dickey-Fuller tests

Ho: All panels contain unit roots           Number of panels       =    36  
Ha: At least one panel is stationary       Avg. number of periods =  24.89

AR parameter: Panel-specific               Asymptotics: T -> Infinity  
Panel means:   Included  
Time trend:    Not included                Cross-sectional means removed  
Drift term:    Included                    ADF regressions: 0 lags

|                           |    | Statistic | p-value |
|---------------------------|----|-----------|---------|
| Inverse chi-squared(72)   | P  | 251.1424  | 0.0000  |
| Inverse normal            | Z  | -10.6446  | 0.0000  |
| Inverse logit t(184)      | L* | -11.3085  | 0.0000  |
| Modified inv. chi-squared | Pm | 14.9285   | 0.0000  |

P statistic requires number of panels to be finite.  
Other statistics are suitable for finite or infinite number of panels.

. xtunitroot fisher Tertiary\_SH , dfuller drift demean lags(1)

Fisher-type unit-root test for Tertiary\_SH  
Based on augmented Dickey-Fuller tests

Ho: All panels contain unit roots           Number of panels       =    36  
Ha: At least one panel is stationary       Avg. number of periods =  24.89

AR parameter: Panel-specific               Asymptotics: T -> Infinity  
Panel means:   Included  
Time trend:    Not included                Cross-sectional means removed  
Drift term:    Included                    ADF regressions: 1 lag

|                           |    | Statistic | p-value |
|---------------------------|----|-----------|---------|
| Inverse chi-squared(72)   | P  | 250.2823  | 0.0000  |
| Inverse normal            | Z  | -10.7436  | 0.0000  |
| Inverse logit t(184)      | L* | -11.3178  | 0.0000  |
| Modified inv. chi-squared | Pm | 14.8569   | 0.0000  |

P statistic requires number of panels to be finite.  
Other statistics are suitable for finite or infinite number of panels.

. xtunitroot fisher Tertiary\_SH , dfuller drift demean lags(2)

Fisher-type unit-root test for Tertiary\_SH  
Based on augmented Dickey-Fuller tests

Ho: All panels contain unit roots           Number of panels       =    36  
Ha: At least one panel is stationary       Avg. number of periods =  24.89

AR parameter: Panel-specific               Asymptotics: T -> Infinity  
Panel means:   Included  
Time trend:    Not included                Cross-sectional means removed  
Drift term:    Included                    ADF regressions: 2 lags



. xtunitroot fisher Tertiary\_SH , dfuller drift demean lags(2)

Fisher-type unit-root test for Tertiary\_SH  
Based on augmented Dickey-Fuller tests

---

Ho: All panels contain unit roots                      Number of panels            =        36  
Ha: At least one panel is stationary                    Avg. number of periods =    24.89

AR parameter: Panel-specific                            Asymptotics: T -> Infinity  
Panel means:    Included  
Time trend:     Not included                            Cross-sectional means removed  
Drift term:     Included                                 ADF regressions: 2 lags

---

|                           |    | Statistic | p-value |
|---------------------------|----|-----------|---------|
| Inverse chi-squared(70)   | P  | 221.7354  | 0.0000  |
| Inverse normal            | Z  | -9.4771   | 0.0000  |
| Inverse logit t(179)      | L* | -9.9982   | 0.0000  |
| Modified inv. chi-squared | Pm | 12.8240   | 0.0000  |

---

P statistic requires number of panels to be finite.  
Other statistics are suitable for finite or infinite number of panels.

---

. xtunitroot fisher Tertiary\_SH , dfuller drift demean lags(3)

Fisher-type unit-root test for Tertiary\_SH  
Based on augmented Dickey-Fuller tests

---

Ho: All panels contain unit roots                      Number of panels            =        36  
Ha: At least one panel is stationary                    Avg. number of periods =    24.89

AR parameter: Panel-specific                            Asymptotics: T -> Infinity  
Panel means:    Included  
Time trend:     Not included                            Cross-sectional means removed  
Drift term:     Included                                 ADF regressions: 3 lags

---

|                           |    | Statistic | p-value |
|---------------------------|----|-----------|---------|
| Inverse chi-squared(66)   | P  | 248.5776  | 0.0000  |
| Inverse normal            | Z  | -10.5236  | 0.0000  |
| Inverse logit t(169)      | L* | -11.6362  | 0.0000  |
| Modified inv. chi-squared | Pm | 15.8913   | 0.0000  |

---

P statistic requires number of panels to be finite.  
Other statistics are suitable for finite or infinite number of panels.

---

. xtunitroot fisher Tertiary\_SH , dfuller drift demean lags(4)  
could not compute test for panel 14

Fisher-type unit-root test for Tertiary\_SH  
Based on augmented Dickey-Fuller tests

---

Ho: All panels contain unit roots                      Number of panels            =        36  
Ha: At least one panel is stationary                    Avg. number of periods =    24.89

AR parameter: Panel-specific                            Asymptotics: T -> Infinity  
Panel means:    Included  
Time trend:     Not included                            Cross-sectional means removed  
Drift term:     Included                                 ADF regressions: 4 lags

---

|                           |    | Statistic | p-value |
|---------------------------|----|-----------|---------|
| Inverse chi-squared(64)   | P  | 202.2672  | 0.0000  |
| Inverse normal            | Z  | -9.0300   | 0.0000  |
| Inverse logit t(164)      | L* | -9.4862   | 0.0000  |
| Modified inv. chi-squared | Pm | 12.2212   | 0.0000  |

---

P statistic requires number of panels to be finite.  
Other statistics are suitable for finite or infinite number of panels.

---

. xtunitroot fisher ln\_PCI, dfuller trend lags(1)

```
. xtunitroot fisher ln_PCI, dfuller trend lags(1)
(129 missing values generated)
could not compute test for panel 14
```

Fisher-type unit-root test for ln\_PCI  
Based on augmented Dickey-Fuller tests

---

```
Ho: All panels contain unit roots      Number of panels      =      37
Ha: At least one panel is stationary    Avg. number of periods = 27.51
```

```
AR parameter: Panel-specific           Asymptotics: T -> Infinity
Panel means:   Included
Time trend:    Included
Drift term:    Not included              ADF regressions: 1 lag
```

---

|                           |    | Statistic | p-value |
|---------------------------|----|-----------|---------|
| Inverse chi-squared(72)   | P  | 163.6694  | 0.0000  |
| Inverse normal            | Z  | -1.9384   | 0.0263  |
| Inverse logit t(184)      | L* | -3.6691   | 0.0002  |
| Modified inv. chi-squared | Pm | 7.6391    | 0.0000  |

---

P statistic requires number of panels to be finite.  
Other statistics are suitable for finite or infinite number of panels.

---

```
. xtunitroot fisher lnCO2_PC , dfuller trend lags(1)
(200 missing values generated)
```

Fisher-type unit-root test for lnCO2\_PC  
Based on augmented Dickey-Fuller tests

---

```
Ho: All panels contain unit roots      Number of panels      =      37
Ha: At least one panel is stationary    Avg. number of periods = 25.59
```

```
AR parameter: Panel-specific           Asymptotics: T -> Infinity
Panel means:   Included
Time trend:    Included
Drift term:    Not included              ADF regressions: 1 lag
```

---

|                           |    | Statistic | p-value |
|---------------------------|----|-----------|---------|
| Inverse chi-squared(74)   | P  | 153.2999  | 0.0000  |
| Inverse normal            | Z  | -2.5360   | 0.0056  |
| Inverse logit t(184)      | L* | -3.4090   | 0.0004  |
| Modified inv. chi-squared | Pm | 6.5184    | 0.0000  |

---

P statistic requires number of panels to be finite.  
Other statistics are suitable for finite or infinite number of panels.

---

. xtunitroot fisher lnMVA , dfuller trend lags(1)  
(411 missing values generated)

Fisher-type unit-root test for lnMVA  
Based on augmented Dickey-Fuller tests

---

Ho: All panels contain unit roots                      Number of panels                =        33  
Ha: At least one panel is stationary                    Avg. number of periods =    22.30

AR parameter: Panel-specific                              Asymptotics: T -> Infinity  
Panel means:    Included  
Time trend:     Included  
Drift term:      Not included                              ADF regressions: 1 lag

---

|                           |    | Statistic | p-value |
|---------------------------|----|-----------|---------|
| Inverse chi-squared(66)   | P  | 156.7716  | 0.0000  |
| Inverse normal            | Z  | -2.9703   | 0.0015  |
| Inverse logit t(164)      | L* | -4.8288   | 0.0000  |
| Modified inv. chi-squared | Pm | 7.9007    | 0.0000  |

---

P statistic requires number of panels to be finite.  
Other statistics are suitable for finite or infinite number of panels.

---

. xtunitroot fisher lnTVA , dfuller trend lags(1)  
(357 missing values generated)  
could not compute test for panel 32

Fisher-type unit-root test for lnTVA  
Based on augmented Dickey-Fuller tests

---

Ho: All panels contain unit roots                      Number of panels                =        34  
Ha: At least one panel is stationary                    Avg. number of periods =    23.24

AR parameter: Panel-specific                              Asymptotics: T -> Infinity  
Panel means:    Included  
Time trend:     Included  
Drift term:      Not included                              ADF regressions: 1 lag

---

|                           |    | Statistic | p-value |
|---------------------------|----|-----------|---------|
| Inverse chi-squared(66)   | P  | 67.3797   | 0.4297  |
| Inverse normal            | Z  | 0.8475    | 0.8016  |
| Inverse logit t(169)      | L* | 0.7663    | 0.7777  |
| Modified inv. chi-squared | Pm | 0.1201    | 0.4522  |

---

P statistic requires number of panels to be finite.  
Other statistics are suitable for finite or infinite number of panels.

---

. xtunitroot fisher d.lnTVA , dfuller trend lags(1)  
(391 missing values generated)

Fisher-type unit-root test for D.lnTVA  
Based on augmented Dickey-Fuller tests

---

Ho: All panels contain unit roots                      Number of panels                      =            33  
Ha: At least one panel is stationary                    Avg. number of periods =    22.91

AR parameter: Panel-specific                              Asymptotics: T -> Infinity  
Panel means:    Included  
Time trend:     Included  
Drift term:     Not included                                ADF regressions: 1 lag

---

|                           |    | Statistic | p-value |
|---------------------------|----|-----------|---------|
| Inverse chi-squared(66)   | P  | 122.8421  | 0.0000  |
| Inverse normal            | Z  | -4.0080   | 0.0000  |
| Inverse logit t(169)      | L* | -4.1743   | 0.0000  |
| Modified inv. chi-squared | Pm | 4.9475    | 0.0000  |

---

P statistic requires number of panels to be finite.  
Other statistics are suitable for finite or infinite number of panels.

---

. xtunitroot fisher Tertiary\_SH , dfuller trend lags(1)  
(251 missing values generated)

Fisher-type unit-root test for Tertiary\_SH  
Based on augmented Dickey-Fuller tests

---

Ho: All panels contain unit roots                      Number of panels                      =            36  
Ha: At least one panel is stationary                    Avg. number of periods =    24.89

AR parameter: Panel-specific                              Asymptotics: T -> Infinity  
Panel means:    Included  
Time trend:     Included  
Drift term:     Not included                                ADF regressions: 1 lag

---

|                           |    | Statistic | p-value |
|---------------------------|----|-----------|---------|
| Inverse chi-squared(72)   | P  | 61.6897   | 0.8017  |
| Inverse normal            | Z  | 0.2822    | 0.6111  |
| Inverse logit t(179)      | L* | 0.1342    | 0.5533  |
| Modified inv. chi-squared | Pm | -0.8592   | 0.8049  |

---

P statistic requires number of panels to be finite.  
Other statistics are suitable for finite or infinite number of panels.

---

. xtunitroot fisher d.Tertiary\_SH , dfuller trend lags(1)  
(287 missing values generated)

Fisher-type unit-root test for D.Tertiary\_SH  
Based on augmented Dickey-Fuller tests

---

Ho: All panels contain unit roots                      Number of panels                      =            36  
Ha: At least one panel is stationary                      Avg. number of periods =            23.89

AR parameter: Panel-specific                                      Asymptotics: T -> Infinity  
Panel means:    Included  
Time trend:     Included  
Drift term:     Not included                                              ADF regressions: 1 lag

---

|                           |    | Statistic | p-value |
|---------------------------|----|-----------|---------|
| Inverse chi-squared(72)   | P  | 319.9763  | 0.0000  |
| Inverse normal            | Z  | -11.4625  | 0.0000  |
| Inverse logit t(179)      | L* | -13.9495  | 0.0000  |
| Modified inv. chi-squared | Pm | 20.6647   | 0.0000  |

---

P statistic requires number of panels to be finite.  
Other statistics are suitable for finite or infinite number of panels.

---

.
